# Supplementary material for: Characterization of the WRKY Gene Family Related to Anthocyanin Biosynthesis and the Regulation Mechanism under Drought Stress and Methyl Jasmonate Treatment in Lycoris radiata
Source: MDPI journal article supplement (doi:10.3390/ijms24032423), 2023-01-26

**Figure S1 .** Conservation and diversity of the motifs in LrWRKY proteins. The schematic representation of ten motifs in WRKY family is elucidated by MEME.

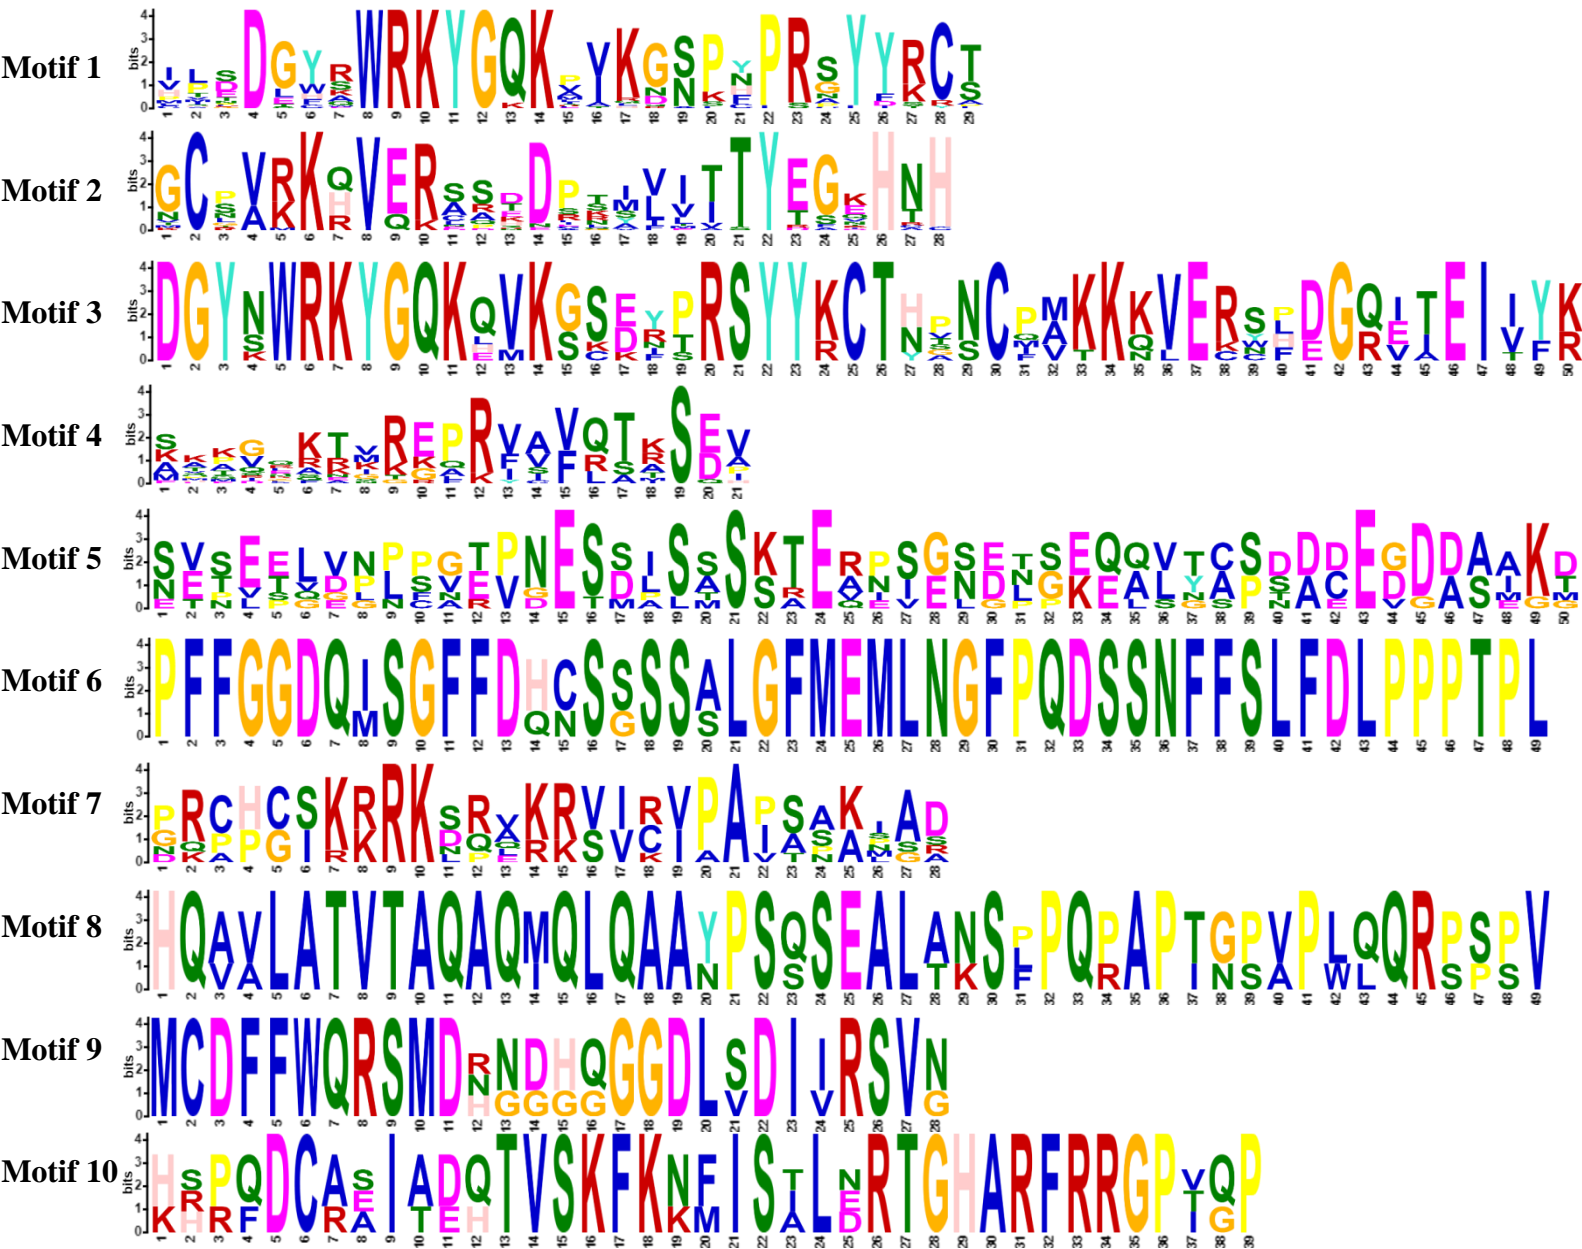

**Figure S2 .** Expression profile heatmap with hierarchal clustering of *LrWRKYs* in different tissues of *L. longituba*. Red and blue represent high and low relative transcript abundance, respectively.

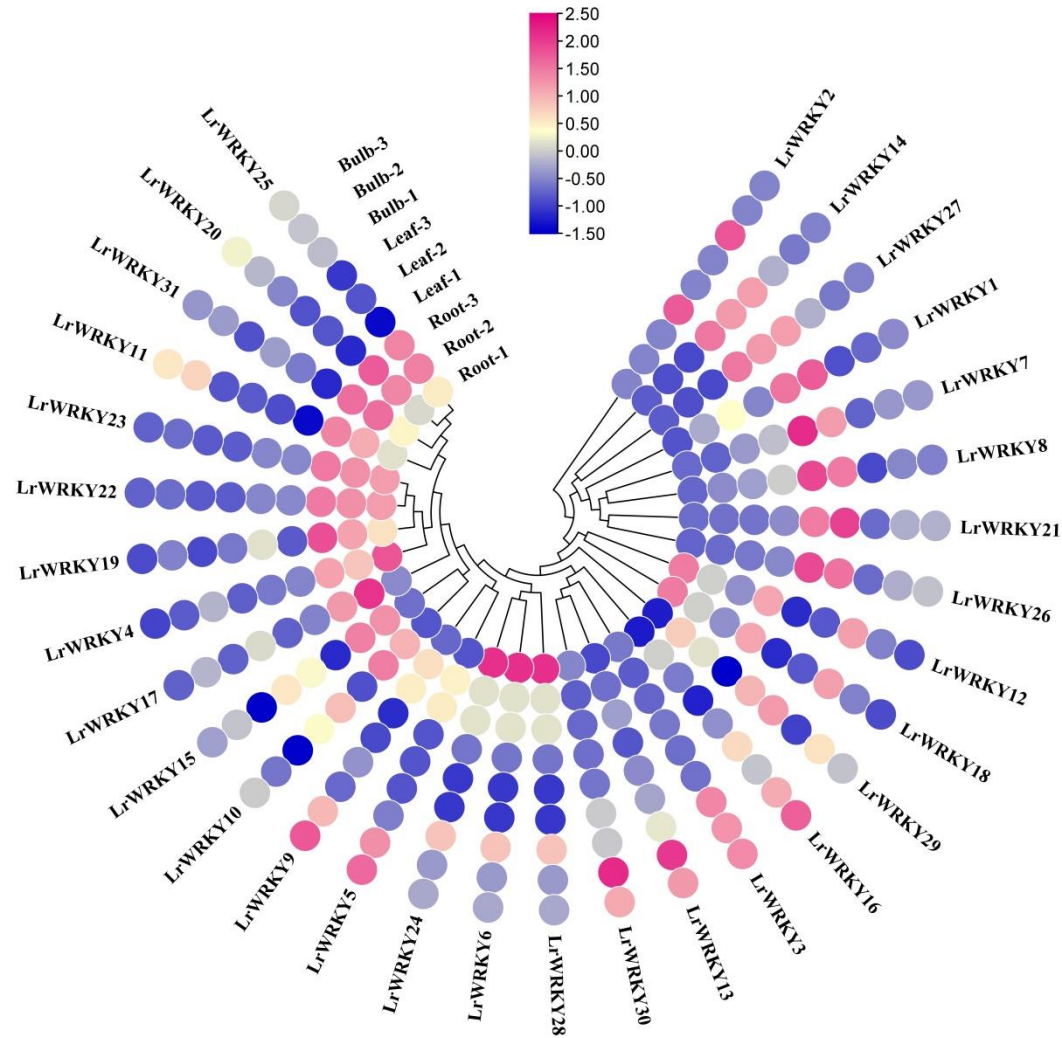

**Figure S3 .** Heatmap of *LrWRKY* genes expression profiles with MeJA treatment. Red and blue represent high and low relative transcript abundance, respectively.

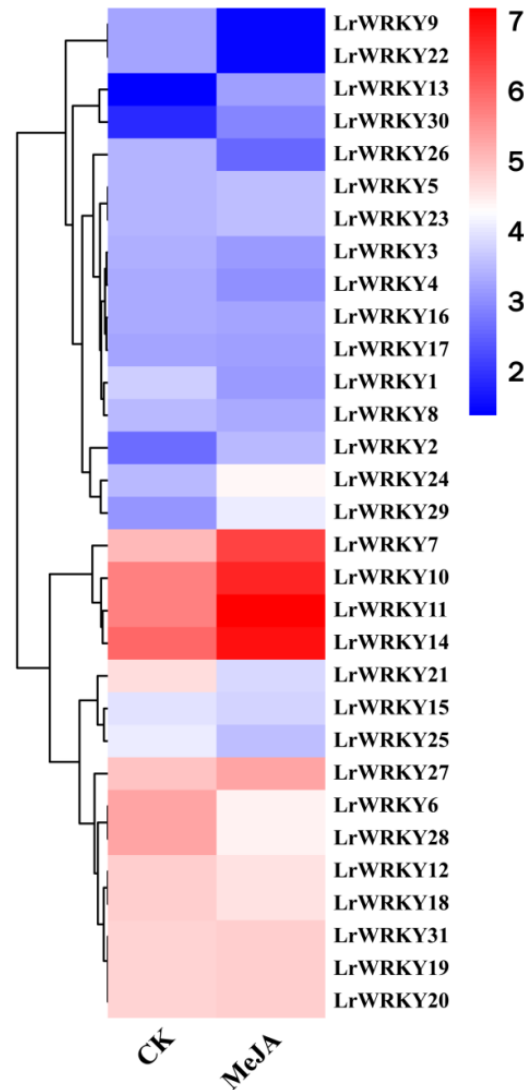

Supplement: s1 [file s1]
