# Supplementary material for: Characterization of the WRKY Gene Family Related to Anthocyanin Biosynthesis and the Regulation Mechanism under Drought Stress and Methyl Jasmonate Treatment in Lycoris radiata
Source: Int J Mol Sci. 2023 Jan 26;24(3):2423. doi: 10.3390/ijms24032423 (PMC9917153; doi:10.3390/ijms24032423)
Supplement: Supplementary file 1 [file ijms-24-02423-s001.zip]

Archive with 7 entries (7 files):
- Supplementary Figure.pdf
- Table S1.xlsx
- Table S2.xlsx
- Table S3.xlsx
- Table S4.xlsx
- Table S5.xls
- Table S6.xlsx
