# Supplementary material for: Characterization of the WRKY Gene Family Related to Anthocyanin Biosynthesis and the Regulation Mechanism under Drought Stress and Methyl Jasmonate Treatment in Lycoris radiata
Source: Int J Mol Sci. 2023 Jan 26;24(3):2423. doi: 10.3390/ijms24032423 (PMC9917153; doi:10.3390/ijms24032423)
Supplement: Supplementary file 1 [file ijms-24-02423-s001.zip › Table S1.xlsx]

## Sheet: Table S1a
Table S1a. Chacteristics of LrWRKY genes identified from Lycoris radiata transcriptome.
Gene name	Gene ID	Amino acid length	Gene length/bp	Isoelectric Point	Molecular weight（Da）	Subcellular Localization	Blast results [Query cover, E-value, Identities, Accession No., and Description (species)]
LrWRKY1	DN20643_c0_g1_i1_2	177	531	8.94	20337.7	Nuclear	93%, 2e-50, 60.84%, XP_020267752.1 probable WRKY transcription factor 75 (Asparagus officinalis)
LrWRKY2	DN26550_c0_g1_i1_2	182	546	5.94	20507.7	Chloroplast	100%, 2e-68, 61.50%, XP_020242404.1, probable WRKY transcription factor 50 (Asparagus officinalis)
LrWRKY3	DN27066_c0_g1_i1_3	165	495	9.35	19264.3	Nuclear	93%, 2e-64, 67.72%, KAG1370131.1, putative WRKY transcription factor 75 (Cocos nucifera)
LrWRKY4	DN28387_c0_g1_i1_3	153	459	9.3	17416.9	Nuclear	100%, 1e-70, 83.33%, ARO76401.1, transcription factor WRKYY1 [Narcissus hybrid cultivar]
LrWRKY5	DN29733_c0_g1_i3_3	341	1023	6.46	37608.1	Nuclear	100%, 2e-83, 43.20%, XP_008788702.2, probable WRKY transcription factor 14 (Phoenix dactylifera)
LrWRKY6	DN30841_c0_g1_i1_2	279	837	9.76	30168	Nuclear	100%, 8e-67, 46.90%, BBG92744.1, WRKY DNA-binding protein 11 (Prunus dulcis)
LrWRKY7	DN33762_c0_g1_i1_1	299	897	7.01	33654	Nuclear	100%, 6e-102, 58.96%, XP_020250516.1, probable WRKY transcription factor 41 (Asparagus officinalis)
LrWRKY8	DN34098_c0_g2_i1_1	214	642	5.06	23875.4	Nuclear	99%, 4e-69, 52.74%, XP_008812523.2, probable WRKY transcription factor 35 (Phoenix dactylifera)
LrWRKY9	DN34212_c0_g1_i3_1	243	729	6.71	27690	Nuclear	100%, 4e-55, 44.00%, XP_020241688.1, probable WRKY transcription factor 46 (Asparagus officinalis)
LrWRKY10	DN34501_c0_g1_i2_2	494	1482	6.62	54418.9	Nuclear	100%, 0.0, 65.61%, XP_020271607.1, WRKY transcription factor WRKY24 (Asparagus officinalis)
LrWRKY11	DN34945_c0_g1_i3_2	184	552	4.8	20304.4	Nuclear	91%, 2e-29, 63.28%, XP_020264078.1, probable WRKY transcription factor 48 (Asparagus officinalis)
LrWRKY12	DN34945_c0_g2_i4_2	291	873	5.51	32484.3	Nuclear	100%, 3e-64, 56.62%, XP_020276667.1, LOW QUALITY PROTEIN: probable WRKY transcription factor 48(Asparagus officinalis)
LrWRKY13	DN34972_c0_g1_i1_1	310	930	8.55	34849.4	Nuclear	100%, 4e-171, 83.81%, AIZ00534.1, transcription factor WRKY40 (Narcissus tazetta subsp. chinensis)
LrWRKY14	DN36604_c1_g1_i3_3	472	1416	6.23	51729	Nuclear	93%, 3e-165, 63.90%, KAG1334942.1, WRKY transcription factor 42 (Cocos nucifera)
LrWRKY15	DN36723_c0_g1_i2_1	429	1287	8.12	47217.2	Endoplasmic reticulum	99%, 0.0, 69.72%, XP_020273957.1, probable WRKY transcription factor 4 (Asparagus officinalis)
LrWRKY16	DN36894_c0_g1_i3_2	510	1530	6.19	56329.8	Nuclear	99%， 0.0， 68.87%， XP_020241386.1， WRKY transcription factor SUSIBA2-like (Asparagus officinalis)
LrWRKY17	DN38112_c0_g5_i2_2	293	879	5.4	33322.1	Nuclear	100%, 5e-66, 48.66%, XP_020258639.1, probable WRKY transcription factor 27 (Asparagus officinalis)
LrWRKY18	DN38372_c0_g2_i1_3	293	879	6.07	32800.6	Nuclear	100%, 1e-73, 51.31%, XP_020276667.1, LOW QUALITY PROTEIN: probable WRKY transcription factor 48 (Asparagus officinalis)
LrWRKY19	DN38379_c1_g1_i2_2	378	1134	8.45	41848.3	Chloroplast	94%, 9e-140, 57.88%, XP_020269634.1, probable WRKY transcription factor 3 (Asparagus officinalis)
LrWRKY20	DN38379_c1_g3_i1_2	391	1173	7.19	42803.3	Nuclear	97%, 2e-135, 58.88%, XP_020269634.1, probable WRKY transcription factor 3 (Asparagus officinalis)
LrWRKY21	DN39577_c0_g1_i1_1	242	726	5.38	27057.2	Nuclear	98%, 5e-78, 48.94%, XP_020275661.1, probable WRKY transcription factor 70 (Asparagus officinalis)
LrWRKY22	DN41714_c0_g1_i1_3	383	1149	5.42	42264.9	Nuclear	100%, 9e-112, 54.25%, XP_008788702.2, probable WRKY transcription factor 14 (Phoenix dactylifera)
LrWRKY23	DN41714_c0_g2_i3_3	393	1179	5.59	43354.2	Nuclear	100%, 3e-113, 52.02%, XP_008788702.2, probable WRKY transcription factor 14 (Phoenix dactylifera)
LrWRKY24	DN41931_c0_g1_i4_1	287	861	9.83	31169.8	Nuclear	100%, 2e-147, 88.54%, ARO76402.1, transcription factor WRKYY2 (Narcissus hybrid cultivar)
LrWRKY25	DN42854_c2_g2_i4_2	355	1065	9.8	39904.2	Nuclear	100%, 2e-178, 79.89%, XP_020256179.1, protein WRKY1-like (Asparagus officinalis)
LrWRKY26	DN43438_c0_g1_i8_3	414	1242	9.31	46947.3	Nuclear	96%, 6e-135, 49.01%, XP_010922487.1, WRKY transcription factor 44 isoform X1 (Elaeis guineensis)
LrWRKY27	DN46358_c0_g1_i1_1	449	1347	7.11	49129.1	Nuclear	100%, 2e-151, 63.49%, XP_008784385.2, probable WRKY transcription factor 31 (Phoenix dactylifera)
LrWRKY28	DN47651_c0_g2_i2_1	280	840	9.62	29769.5	Nuclear	33%, 4e-41, 73.40%, KAH6782240.1, WRKY DNA-binding protein 7 (Perilla frutescens var. frutescens)
LrWRKY29	DN52134_c0_g1_i2_1	610	1830	5.9	66532.5	Nuclear	100%, 0.0, 63.68%, XP_020275946.1, probable WRKY transcription factor 2 isoform X2 (Asparagus officinalis)
LrWRKY30	DN6175_c0_g1_i1_1	189	567	9.22	21715.2	Nuclear	98%, 3e-69, 63.05%, XP_020248961.1, probable WRKY transcription factor 12 (Asparagus officinalis)
LrWRKY31	DN50693_c0_g1_i1_1	461	1383	6.11	49989.1	Nuclear	97%, 6e-176, 65.01%, XP_020269634.1, probable WRKY transcription factor 3 (Asparagus officinalis)

## Sheet: Table S1b
Table S1b. Chacteristics of LrWRKY genes identified from Lycoris longitubatranscriptome.
Gene name	L. longituba Gene ID	Root-1	Root-2	Root-3	Leaf-1	Leaf-2	Leaf-3	Bulb-1	Bulb-2	Bulb-3	NR
LrWRKY1	c120818_g1	0.08	0.43	0.77	0.28	1.42	1.54	0.07	0.16	0.3	gi|743755169|ref|XP_010936886.1| PREDICTED: probable WRKY transcription factor 45 [Elaeis guineensis]
LrWRKY2	c269915_g1	0	0	0	0.53	0	0	0.54	0	0	gi|743755141|ref|XP_010935437.1| PREDICTED: probable WRKY transcription factor 50 [Elaeis guineensis]
LrWRKY3	c128543_g1	1.5	0.86	1.05	1.45	1.25	1.32	7.53	7.17	7.4	gi|743774387|ref|XP_010917544.1| PREDICTED: probable WRKY transcription factor 75 isoform X1 [Elaeis guineensis]
LrWRKY4	c134566_g2	9.38	6.71	7.52	2.85	2.6	2.09	3.79	2	1.52	gi|1000981824|ref|XP_015583825.1| PREDICTED: LOW QUALITY PROTEIN: probable WRKY transcription factor 57 [Ricinus communis]
LrWRKY5	c138587_g5	0	0.89	0.92	0	0	0	0.2	1.44	1.66	gi|731370136|ref|XP_010665626.1| PREDICTED: probable WRKY transcription factor 14 [Beta vulgaris subsp. vulgaris] gi|870843539|gb|KMS96690.1| hypothetical protein BVRB_8g200770 isoform A [Beta vulgaris subsp. vulgaris]
LrWRKY6	c143325_g1	126.02	58.51	59.02	32.11	17.13	17.01	82.98	40.97	44.69	gi|743812016|ref|XP_010929316.1| PREDICTED: probable WRKY transcription factor 11 [Elaeis guineensis]
LrWRKY7	c124707_g1	0.08	0	0.6	1.02	4.58	3.07	0	0.58	0.59	gi|672121069|ref|XP_008783826.1| PREDICTED: probable WRKY transcription factor 41 [Phoenix dactylifera]
LrWRKY8	c126955_g1	1.54	2.93	3.62	5.25	14.78	12.62	0.53	2.73	2.5	gi|731395672|ref|XP_002270750.3| PREDICTED: probable WRKY transcription factor 65 [Vitis vinifera] gi|297743986|emb|CBI36956.3| unnamed protein product [Vitis vinifera]
LrWRKY9	c133847_g1	2.85	9.1	8.5	0.9	1.85	4.26	2.93	10.62	14.41	gi|672130001|ref|XP_008788524.1| PREDICTED: probable WRKY transcription factor 70 [Phoenix dactylifera]
LrWRKY10	c140765_g2	4.89	10.77	12.17	4.78	10.43	8.8	2.96	5.6	7.54	gi|743782079|ref|XP_010921056.1| PREDICTED: probable WRKY transcription factor 33 [Elaeis guineensis]
LrWRKY11	c130834_g1	1.55	2.27	2.55	0.33	0.72	0.79	0.76	2	1.87	gi|743795062|ref|XP_010924354.1| PREDICTED: probable WRKY transcription factor 71 [Elaeis guineensis]
LrWRKY12	c142459_g1	49.01	33.77	29.1	45.17	21.52	24.94	45.83	28	24.02	gi|743783515|ref|XP_010921433.1| PREDICTED: probable WRKY transcription factor 48 [Elaeis guineensis] gi|743783519|ref|XP_010921434.1| PREDICTED: probable WRKY transcription factor 48 [Elaeis guineensis] gi|743783523|ref|XP_010921435.1| PREDICTED: probable WRKY transcription factor 48 [Elaeis guineensis]
LrWRKY13	c139279_g4	2.32	3.78	5.47	2.79	4.77	5.7	8.11	17.51	13.34	gi|728893774|gb|AIZ00534.1| transcription factor WRKY40 [Narcissus tazetta var. chinensis]
LrWRKY14	c140675_g1	11.23	9.39	8.56	56.04	50.2	49.73	22.81	15.14	16.27	gi|743758319|ref|XP_010926185.1| PREDICTED: probable WRKY transcription factor 31 [Elaeis guineensis]
LrWRKY15	c137588_g2	9.46	21.2	22.13	6.42	15.39	16.77	4.67	13.05	11.56	gi|672127257|ref|XP_008787092.1| PREDICTED: probable WRKY transcription factor 4 [Phoenix dactylifera] gi|672127259|ref|XP_008787093.1| PREDICTED: probable WRKY transcription factor 4 [Phoenix dactylifera] gi|672127261|ref|XP_008787094.1| PREDICTED: probable WRKY transcription factor 4 [Phoenix dactylifera] gi|672127263|ref|XP_008787095.1| PREDICTED: probable WRKY transcription factor 4 [Phoenix …
LrWRKY16	c143789_g1	18.52	31.4	25.45	18.98	26.86	37.97	30.6	41.99	48.43	gi|743867387|ref|XP_010905301.1| PREDICTED: probable WRKY transcription factor 20 isoform X2 [Elaeis guineensis]
LrWRKY17	c119486_g1	0.11	1.06	0.74	0.09	0	0.32	0	0.22	0	gi|672107165|ref|XP_008797253.1| PREDICTED: WRKY transcription factor 22-like [Phoenix dactylifera]
LrWRKY18	c142459_g1	49.01	33.77	29.1	45.17	21.52	24.94	45.83	28	24.02	gi|743783515|ref|XP_010921433.1| PREDICTED: probable WRKY transcription factor 48 [Elaeis guineensis] gi|743783519|ref|XP_010921434.1| PREDICTED: probable WRKY transcription factor 48 [Elaeis guineensis] gi|743783523|ref|XP_010921435.1| PREDICTED: probable WRKY transcription factor 48 [Elaeis guineensis]
LrWRKY19	c148555_g3	4.55	5.34	6.39	2.46	3.89	2.77	2.27	2.87	2.3	gi|672195194|ref|XP_008776488.1| PREDICTED: probable WRKY transcription factor 4 isoform X1 [Phoenix dactylifera]
LrWRKY20	c148555_g2	5.67	8.62	9.45	2.79	3.53	3.47	4.32	5.13	6.09	gi|672195194|ref|XP_008776488.1| PREDICTED: probable WRKY transcription factor 4 isoform X1 [Phoenix dactylifera]
LrWRKY21	c143161_g1	0.62	0.75	0.83	1.62	10.29	12.55	0.55	2.67	2.81	gi|695034341|ref|XP_009404676.1| PREDICTED: probable WRKY transcription factor 70 [Musa acuminata subsp. malaccensis]
LrWRKY22	c138587_g4	4.45	4.68	5.08	0.92	0.89	0.25	0.23	0.52	0.35	gi|672109145|ref|XP_008788702.1| PREDICTED: probable WRKY transcription factor 14 [Phoenix dactylifera]
LrWRKY23	c138587_g4	4.45	4.68	5.08	0.92	0.89	0.25	0.23	0.52	0.35	gi|672109145|ref|XP_008788702.1| PREDICTED: probable WRKY transcription factor 14 [Phoenix dactylifera]
LrWRKY24	c143325_g1	126.02	58.51	59.02	32.11	17.13	17.01	82.98	40.97	44.69	gi|743812016|ref|XP_010929316.1| PREDICTED: probable WRKY transcription factor 11 [Elaeis guineensis]
LrWRKY25	c146891_g2	35.72	44.5	44.08	17.37	22.52	20.56	29.62	30.17	31.43	gi|743791558|ref|XP_010923468.1| PREDICTED: protein WRKY1-like isoform X1 [Elaeis guineensis]
LrWRKY26	c144043_g3	0.08	0.23	0.53	0.89	8.42	7.32	0.22	1.75	2.18	gi|743787724|ref|XP_010922486.1| PREDICTED: WRKY transcription factor 44-like [Elaeis guineensis] gi|743787728|ref|XP_010922487.1| PREDICTED: WRKY transcription factor 44-like [Elaeis guineensis] gi|743787732|ref|XP_010922488.1| PREDICTED: WRKY transcription factor 44-like [Elaeis guineensis]
LrWRKY27	c140675_g1	11.23	9.39	8.56	56.04	50.2	49.73	22.81	15.14	16.27	gi|743758319|ref|XP_010926185.1| PREDICTED: probable WRKY transcription factor 31 [Elaeis guineensis]
LrWRKY28	c143325_g1	126.02	58.51	59.02	32.11	17.13	17.01	82.98	40.97	44.69	gi|743812016|ref|XP_010929316.1| PREDICTED: probable WRKY transcription factor 11 [Elaeis guineensis]
LrWRKY29	c144043_g4	13.65	29.59	24.64	12	31.22	33.04	15.65	28.04	22.92	gi|743766041|ref|XP_010913249.1| PREDICTED: probable WRKY transcription factor 2 [Elaeis guineensis] gi|743766043|ref|XP_010913250.1| PREDICTED: probable WRKY transcription factor 2 [Elaeis guineensis] gi|743766045|ref|XP_010913251.1| PREDICTED: probable WRKY transcription factor 2 [Elaeis guineensis] gi|743766047|ref|XP_010913252.1| PREDICTED: probable WRKY transcription factor 2 [Elaeis guineen…
LrWRKY30	c116040_g1	0.39	0	0.1	0.17	0.22	1.07	1.04	4.16	2.62	gi|672142124|ref|XP_008794914.1| PREDICTED: probable WRKY transcription factor 12 isoform X1 [Phoenix dactylifera]
LrWRKY31	c148555_g1	42.25	59.08	58.81	18.56	27.26	30.72	22.87	30.61	29.99	gi|672195194|ref|XP_008776488.1| PREDICTED: probable WRKY transcription factor 4 isoform X1 [Phoenix dactylifera]

## Sheet: Table S1c
Table S1c. Chacteristics of LrWRKY genes identified from Lycoris aurea transcriptome.
Gene name	Lycoris aurea gene ID	CK_rawfragments(8253933)	CK_FPKM	TREAT_rawfragments(8017301)	TREAT_FPKM	Nr-annotation
LrWRKY1	CL5258.Contig1_All	61	12.0956	38	7.7574	uncharacterized protein LOC100500248 [Glycine max]
LrWRKY2	CL2502.Contig1_All	44	5.1456	86	10.3541	hypothetical protein SORBIDRAFT_03g032800 [Sorghum bicolor] >gi|241930375|gb|EES03520.1| hypothetical protein SORBIDRAFT_03g032800 [Sorghum bicolor]
LrWRKY3	Unigene13160_All	48	9.2898	39	7.7707	transcription factor WRKY-1 [Coptis japonica var. dissecta]
LrWRKY4	CL4159.Contig1_All	45	9.117	35	7.3003	hypothetical protein PRUPE_ppa008480mg [Prunus persica]
LrWRKY5	CL1506.Contig3_All	102	9.6923	112	10.9567	PREDICTED: probable WRKY transcription factor 65 [Vitis vinifera] >gi|297740534|emb|CBI30716.3| unnamed protein product [Vitis vinifera]
LrWRKY6	CL7968.Contig2_All	267	38.3727	139	20.5664	predicted protein [Populus trichocarpa] >gi|222854974|gb|EEE92521.1| predicted protein [Populus trichocarpa]
LrWRKY7	CL2669.Contig3_All	303	33.1915	749	84.4692	putative WRKY transcription factor 30 [Vitis aestivalis]
LrWRKY8	Unigene11992_All	42	10.4917	35	9.0012	PREDICTED: LOW QUALITY PROTEIN: WRKY transcription factor 22 [Vitis vinifera]
LrWRKY9	Unigene20342_All	20	8.4723	4	1.7445	--
LrWRKY10	CL11162.Contig2_All	517	51.0904	1031	104.891	PREDICTED: probable WRKY transcription factor 33-like [Vitis vinifera]
LrWRKY11	Unigene7003_All	569	51.6768	1549	144.833	WRKY transcription factor, putative [Ricinus communis] >gi|223545731|gb|EEF47235.1| WRKY transcription factor, putative [Ricinus communis]
LrWRKY12	Unigene8791_All	225	28.1028	179	23.0172	PREDICTED: probable WRKY transcription factor 48 [Vitis vinifera] >gi|296083226|emb|CBI22862.3| unnamed protein product [Vitis vinifera]
LrWRKY13	Unigene9949_All	14	1.6002	69	8.1192	predicted protein [Populus trichocarpa] >gi|118487935|gb|ABK95789.1| unknown [Populus trichocarpa] >gi|222841284|gb|EEE78831.1| predicted protein [Populus trichocarpa]
LrWRKY14	CL4458.Contig2_All	952	63.0268	1826	124.458	hypothetical protein PRUPE_ppa002619mg [Prunus persica]
LrWRKY15	Unigene11501_All	227	14.5206	193	12.7101	DNA-binding protein [Vitis thunbergii]
LrWRKY16	CL8091.Contig2_All	129	9.2043	115	8.4476	hypothetical protein OsI_26641 [Oryza sativa Indica Group]
LrWRKY17	CL1506.Contig1_All	88	8.6259	81	8.1741	PREDICTED: probable WRKY transcription factor 65 [Vitis vinifera] >gi|297740534|emb|CBI30716.3| unnamed protein product [Vitis vinifera]
LrWRKY18	Unigene8791_All	225	28.1028	179	23.0172	PREDICTED: probable WRKY transcription factor 48 [Vitis vinifera] >gi|296083226|emb|CBI22862.3| unnamed protein product [Vitis vinifera]
LrWRKY19	CL5273.Contig1_All	693	25.9536	717	27.645	PREDICTED: probable WRKY transcription factor 4-like [Brachypodium distachyon]
LrWRKY20	CL5273.Contig1_All	693	25.9536	717	27.645	PREDICTED: probable WRKY transcription factor 4-like [Brachypodium distachyon]
LrWRKY21	CL6802.Contig1_All	237	24.19	130	13.6604	WRKY transcription factor, putative [Ricinus communis] >gi|223531869|gb|EEF33686.1| WRKY transcription factor, putative [Ricinus communis]
LrWRKY22	Unigene20342_All	20	8.4723	4	1.7445	--
LrWRKY23	CL1506.Contig3_All	102	9.6923	112	10.9567	PREDICTED: probable WRKY transcription factor 65 [Vitis vinifera] >gi|297740534|emb|CBI30716.3| unnamed protein product [Vitis vinifera]
LrWRKY24	CL4966.Contig3_All	103	10.3302	187	19.3084	DNA-binding protein [Vitis thunbergii]
LrWRKY25	CL9637.Contig1_All	132	15.8812	86	10.6522	PREDICTED: probable WRKY transcription factor 74-like [Vitis vinifera]
LrWRKY26	Unigene10354_All	122	9.7242	61	5.0056	predicted protein [Populus trichocarpa] >gi|222833519|gb|EEE71996.1| predicted protein [Populus trichocarpa]
LrWRKY27	CL4458.Contig1_All	387	30.0556	473	37.8189	WRKY transcription factor, putative [Ricinus communis] >gi|223535898|gb|EEF37558.1| WRKY transcription factor, putative [Ricinus communis]
LrWRKY28	CL7968.Contig2_All	267	38.3727	139	20.5664	predicted protein [Populus trichocarpa] >gi|222854974|gb|EEE92521.1| predicted protein [Populus trichocarpa]
LrWRKY29	CL1764.Contig4_All	135	7.4718	283	16.1255	hypothetical protein VITISV_039673 [Vitis vinifera]
LrWRKY30	CL7610.Contig2_All	18	2.6824	42	6.4436	WRKY16 protein [Solanum lycopersicum]
LrWRKY31	CL5273.Contig1_All	693	25.9536	717	27.645	PREDICTED: probable WRKY transcription factor 4-like [Brachypodium distachyon]
