# Supplementary material for: Characterization of the WRKY Gene Family Related to Anthocyanin Biosynthesis and the Regulation Mechanism under Drought Stress and Methyl Jasmonate Treatment in Lycoris radiata
Source: Int J Mol Sci. 2023 Jan 26;24(3):2423. doi: 10.3390/ijms24032423 (PMC9917153; doi:10.3390/ijms24032423)
Supplement: Supplementary file 1 [file ijms-24-02423-s001.zip › Table S2.xlsx]

## Sheet: Table S2
Table S2. The Pearson’s correlation coefficients of LrWRKYs with anthocyanin biosynthesis pathway in L. radiata.
Gene ID	LrWRKY1	LrWRKY2	LrWRKY3	LrWRKY4	LrWRKY5	LrWRKY6	LrWRKY7	LrWRKY8	LrWRKY9	LrWRKY10	LrWRKY11	LrWRKY12	LrWRKY13	LrWRKY14	LrWRKY15	LrWRKY16	LrWRKY17	LrWRKY18	LrWRKY19	LrWRKY20	LrWRKY21	LrWRKY22	LrWRKY23	LrWRKY24	LrWRKY25	LrWRKY26	LrWRKY27	LrWRKY28	LrWRKY29	LrWRKY30	LrWRKY31
Cyanidin-3-O-(6"-O-acetyl-2"-O-xylosyl)glucoside	0.385652	-0.57789	0.664941	-0.67875	-0.00706676	0.621971	0.383853	0.36026	0.387788	-0.365109	0.223171	0.425761	0.618385	-0.428686	0.461879	-0.605728	0.483096	0.223171	0.651396	0.115971	-0.0641215	-0.479645	0.713175	0.852759	-0.464183	0.773647	0.596222	0.852759	-0.674352	-0.0356761	0.275351
Cyanidin-3-O-(2''-O-glucosyl)glucoside	0.0682824	0.612867	0.0512665	0.666936	0.167796	-0.0176652	0.376885	-0.793483	-0.526951	0.828077	-0.145101	-0.471384	0.107644	0.622277	0.284634	0.246614	-0.00929872	-0.145101	-0.292511	-0.431921	0.758285	-0.202427	-0.708132	-0.27432	0.0602854	-0.391705	0.135071	-0.27432	0.0347776	0.51783	0.469375
Cyanidin-3-O-(6''-O-caffeoyl-2''-O-xylosyl)glucoside	0.0662976	0.489502	-0.0447793	0.649794	0.362688	-0.0731928	0.318014	-0.80061	-0.403153	0.678103	-0.0855262	-0.533677	-0.088113	0.53858	0.163079	0.114642	-0.0570375	-0.0855262	-0.533158	-0.238131	0.625197	-0.0476318	-0.551057	-0.421797	-0.0559352	-0.308769	0.0844298	-0.421797	0.0213836	0.357797	0.275745
Cyanidin-3-O-(6''-O-caffeoyl)glucoside	0.52667	0.0153435	0.616256	0.240601	0.700239	0.489519	0.868509	-0.86263	0.0274814	0.642529	0.345009	-0.177412	0.460662	0.475512	0.565201	-0.435341	0.498847	0.345009	-0.255119	-0.0297623	0.797607	-0.569128	-0.0424887	0.174224	-0.57292	0.398093	0.73722	0.174224	-0.581472	0.465656	0.598636
Cyanidin-3-O-(6''-O-feruloyl)glucoside-5-O-glucoside	0.385311	-0.757646	0.515973	-0.531317	0.634476	0.462418	0.385329	0.118716	0.74608	-0.437572	0.595628	0.351438	0.232578	-0.278012	0.177399	-0.83164	0.560752	0.595628	-0.0579319	0.620426	-0.186935	-0.212629	0.904716	0.420433	-0.761634	0.928305	0.568501	0.420433	-0.649256	-0.184272	-0.0770633
Cyanidin-3-O-(6''-O-p-coumaroyl-2''-O-xylosyl)glucoside	0.284056	0.344791	0.492383	0.0839059	-0.335282	0.349893	0.479431	-0.369395	-0.34959	0.699455	-0.105581	0.155285	0.739246	0.383767	0.48796	0.26004	0.206493	-0.105581	0.658479	-0.596986	0.727542	-0.743395	-0.506081	0.485891	0.191487	-0.128966	0.369951	0.485891	-0.146585	0.599237	0.766709
Cyanidin-3-O-(6''-O-p-coumaroyl-2'''-O-sinapoyl)sambubioside-5-O-(6''''-O-malonyl)glucoside	0.372476	0.381003	0.455317	0.466638	0.293473	0.317395	0.711923	-0.895738	-0.322101	0.913766	0.0907981	-0.212193	0.489577	0.665001	0.501485	0.0145024	0.277553	0.0907981	-0.0446657	-0.377502	0.952613	-0.59886	-0.525641	0.0719567	-0.155051	-0.0549096	0.50695	0.0719567	-0.265276	0.67808	0.720936
Cyanidin-3-O-(6''-O-p-Coumaroyl)glucoside	0.3329	0.445146	0.42449	0.445451	0.143009	0.335917	0.679556	-0.808238	-0.494275	0.863302	-0.0930167	-0.32994	0.490111	0.543484	0.601317	0.0336848	0.204353	-0.0930167	0.0356116	-0.525107	0.925998	-0.555309	-0.538529	0.127655	-0.0939871	-0.103116	0.482183	0.127655	-0.285879	0.627448	0.778581
Cyanidin-3-O-(6''-O-p-hydroxybenzoyl)sophoroside-5-O-glucoside	0.413308	-0.616543	0.684145	-0.698279	0.111262	0.644848	0.415174	0.327883	0.449168	-0.385702	0.277792	0.405255	0.58768	-0.431338	0.467153	-0.685329	0.517591	0.277792	0.55552	0.192332	-0.0713448	-0.464267	0.780935	0.832289	-0.553118	0.838711	0.632163	0.832289	-0.721627	-0.061773	0.253912
Cyanidin-3-O-[6''-O-(E)-p-coumaroyl-2''-O-xylosyl]glucoside-5-O-glucoside	-0.260567	0.183218	-0.161681	0.54883	0.268355	-0.361152	0.137522	-0.680176	-0.171438	0.653868	0.0579966	-0.144909	-0.212854	0.646417	0.024221	0.327869	0.0459423	0.0579966	-0.302411	-0.00331884	0.411861	-0.126857	-0.54236	-0.525133	0.221216	-0.342102	-0.0355632	-0.525133	0.299693	0.226971	0.0413262
Cyanidin-3-O-glucoside (Kuromanin)	0.0316878	0.660092	-0.0333284	0.708675	0.0963775	-0.0675111	0.292959	-0.759052	-0.569402	0.820554	-0.181079	-0.487686	0.046519	0.62655	0.208723	0.336603	-0.0994372	-0.181079	-0.304671	-0.458058	0.710215	-0.126792	-0.772893	-0.340792	0.148427	-0.483398	0.0470845	-0.340792	0.129787	0.482122	0.420393
Cyanidin-3-O-sambubioside [Cyanidin-3-O-(2''-O-xylosyl)glucoside]	0.427133	-0.597348	0.720766	-0.660395	0.0893375	0.65035	0.462643	0.278046	0.427319	-0.313797	0.281991	0.422382	0.648664	-0.379216	0.503962	-0.651928	0.547855	0.281991	0.604957	0.148418	-0.00436446	-0.52678	0.726479	0.862588	-0.534498	0.82581	0.663865	0.862588	-0.726019	-0.00351351	0.313583
Cyanidin-3-O-sophoroside-5-O-glucoside	-0.321935	0.789872	-0.510373	0.60264	-0.317349	-0.343247	-0.238451	-0.284504	-0.808678	0.426997	-0.600213	-0.694796	-0.365776	0.257338	-0.0432621	0.547052	-0.531905	-0.600213	-0.315156	-0.589414	0.237781	0.365698	-0.777329	-0.531659	0.472093	-0.804383	-0.439592	-0.531659	0.446576	0.113684	0.0692998
Delphinidin-3-O-glucoside (Mirtillin)	-0.482543	0.7411	-0.716377	0.540949	-0.505131	-0.61009	-0.55305	-0.070958	-0.636951	0.295472	-0.542088	-0.433619	-0.506719	0.245856	-0.387306	0.794641	-0.659337	-0.542088	-0.225825	-0.447762	-0.00406305	0.468996	-0.83161	-0.649066	0.727705	-0.970172	-0.735485	-0.649066	0.757495	0.0726488	-0.172899
Delphinidin-3-O-rutinoside-7-O-glucoside	0.46546	0.00526569	0.740761	-0.100459	-0.163762	0.620259	0.690388	-0.266262	-0.260624	0.408446	-0.0845795	0.103998	0.866809	0.0596576	0.765164	-0.1998	0.391127	-0.0845795	0.699045	-0.471995	0.663927	-0.801211	-0.0457953	0.746498	-0.183732	0.321304	0.682514	0.746498	-0.580401	0.449843	0.835649
Delphinidin-3,5,3'-Tri-O-glucoside	-0.450679	0.519225	-0.512853	0.081096	-0.920483	-0.315844	-0.581018	0.451981	-0.685318	-0.0869769	-0.77365	-0.291094	-0.207633	-0.26029	-0.100982	0.634713	-0.620186	-0.77365	0.389549	-0.604409	-0.220124	0.351828	-0.488427	-0.0901371	0.702709	-0.724227	-0.599822	-0.0901371	0.495132	-0.172855	-0.050277
Malvidin-3-O-(6''-O-malonyl)glucoside	-0.386397	-0.387606	-0.47447	-0.441085	-0.263648	-0.337045	-0.726943	0.882152	0.341297	-0.911824	-0.0669747	0.211833	-0.520703	-0.638065	-0.533985	-0.0181571	-0.282494	-0.0669747	0.00784028	0.40907	-0.957746	0.620641	0.523161	-0.116646	0.14365	0.0464966	-0.519825	-0.116646	0.283123	-0.668087	-0.754448
Pelargonidin-3-O-glucoside-5-O-arabinoside	0.634796	-0.429735	0.928897	-0.386984	0.4052	0.815077	0.849754	-0.211339	0.304865	0.0897397	0.377209	0.211797	0.798774	-0.0630487	0.743719	-0.763225	0.711378	0.377209	0.377899	0.036684	0.43369	-0.720747	0.553956	0.822582	-0.741934	0.874714	0.946398	0.822582	-0.920576	0.273319	0.60477
Peonidin-3-O-(6''-O-caffeoyl)glucoside	0.644646	-0.101361	0.843898	-0.0305398	0.538487	0.770373	0.970525	-0.606678	0.0319248	0.449241	0.302279	-0.111164	0.71	0.220788	0.799764	-0.659776	0.618309	0.302279	0.0737717	-0.125372	0.735311	-0.680261	0.212311	0.549299	-0.700758	0.642724	0.939846	0.549299	-0.856227	0.44796	0.737769
Peonidin-3-O-(6''-O-p-Coumaroyl)glucoside	0.489294	0.212881	0.639549	0.31829	0.443878	0.49365	0.872428	-0.86204	-0.175823	0.811986	0.221685	-0.155735	0.608221	0.571504	0.635008	-0.242085	0.46784	0.221685	-0.0252376	-0.27342	0.938421	-0.681309	-0.278506	0.24691	-0.378245	0.22246	0.715751	0.24691	-0.503183	0.640712	0.763653
Petunidin-3-O-glucoside	0.0362543	-0.464525	-0.0603169	-0.253454	0.607521	0.0840277	-0.00189788	0.154642	0.493264	-0.527794	0.389233	-0.0479089	-0.360008	-0.297588	-0.145353	-0.601331	0.167045	0.389233	-0.580744	0.641206	-0.457756	0.385391	0.682852	-0.169223	-0.483101	0.521464	0.114045	-0.169223	-0.261628	-0.493015	-0.452046
