# Supplementary material for: Characterization of the WRKY Gene Family Related to Anthocyanin Biosynthesis and the Regulation Mechanism under Drought Stress and Methyl Jasmonate Treatment in Lycoris radiata
Source: Int J Mol Sci. 2023 Jan 26;24(3):2423. doi: 10.3390/ijms24032423 (PMC9917153; doi:10.3390/ijms24032423)
Supplement: Supplementary file 1 [file ijms-24-02423-s001.zip › Table S3.xlsx]

## Sheet: Table S3
Table S3. The Pearson’s correlation coefficients of LrWRKYs with anthocyanin biosynthesis pathway in L. radiata.
Gene name	Gene ID	LrWRKY1	LrWRKY2	LrWRKY3	LrWRKY4	LrWRKY5	LrWRKY6	LrWRKY7	LrWRKY8	LrWRKY9	LrWRKY10	LrWRKY11	LrWRKY12	LrWRKY13	LrWRKY14	LrWRKY15	LrWRKY16	LrWRKY17	LrWRKY18	LrWRKY19	LrWRKY20	LrWRKY21	LrWRKY22	LrWRKY23	LrWRKY24	LrWRKY25	LrWRKY26	LrWRKY27	LrWRKY28	LrWRKY29	LrWRKY30	LrWRKY31
PAL	DN34707_c4_g1_i8_2	-0.407311	-0.336691	-0.491988	-0.354167	-0.415636	-0.334081	-0.581961	0.967321	-0.0321493	-0.819262	-0.203072	-0.0238439	-0.511418	-0.582684	-0.467229	-0.0883507	-0.37296	-0.203072	-0.000387434	0.382201	-0.856769	0.715515	0.595889	-0.198704	0.097143	-0.120252	-0.476519	-0.198704	0.240861	-0.480143	-0.695691
PAL	DN41272_c0_g1_i1_3	0.159393	-0.226555	0.471154	-0.236447	0.510132	0.775298	0.675256	-0.25439	-0.135674	-0.246738	-0.0548012	-0.286876	0.175359	-0.271514	0.770503	-0.743208	0.311655	-0.0548012	-0.260306	-0.113687	0.209754	-0.23752	0.49732	0.414897	-0.714869	0.696369	0.749573	0.414897	-0.759357	-0.0952403	0.393365
PAL	DN42054_c0_g1_i4_2	-0.0229465	0.227403	0.345506	-0.0953176	0.0220632	0.64404	0.504129	-0.477192	-0.471257	0.245273	-0.359256	-0.459082	0.437534	-0.0366072	0.858401	-0.205392	0.128186	-0.359256	0.294886	-0.697283	0.509536	-0.515593	-0.143348	0.527838	-0.15542	0.168906	0.525094	0.527838	-0.517856	0.319206	0.765051
PAL	DN44524_c0_g1_i1_2	0.0644236	0.253602	0.185236	0.384132	0.427154	0.4212	0.474774	-0.71754	-0.364723	0.364604	-0.143684	-0.448514	-0.00410494	0.282315	0.538065	-0.175147	0.157019	-0.143684	-0.444937	-0.347582	0.388229	-0.201399	-0.179976	-0.0770724	-0.253302	0.191748	0.457248	-0.0770724	-0.228531	-0.00557226	0.354974
PAL	DN51286_c1_g1_i1_1	0.729773	-0.684608	0.806926	-0.30322	0.834526	0.411466	0.748393	-0.24347	0.843243	-0.0279775	0.818236	0.71753	0.479113	0.11275	0.264148	-0.67951	0.817691	0.818236	-0.0729829	0.598505	0.375838	-0.521786	0.45138	0.396312	-0.740866	0.890313	0.749313	0.396312	-0.653325	0.0639904	0.183962
C4H	DN51788_c0_g3_i1_1	0.40549	-0.329045	0.715553	-0.389585	0.537211	0.866684	0.861995	-0.376319	0.0869773	-0.0787428	0.126668	-0.0175108	0.560443	-0.183981	0.876678	-0.776116	0.528095	0.126668	0.0968884	-0.157144	0.505208	-0.602379	0.400943	0.713884	-0.72904	0.797798	0.894376	0.713884	-0.93307	0.12238	0.622094
C4H	DN45853_c0_g2_i4_3	0.293956	-0.328875	0.678088	-0.433449	0.53818	0.869236	0.815728	-0.255451	0.0892219	-0.20125	0.131924	-0.0212843	0.46046	-0.279747	0.849777	-0.830542	0.494106	0.131924	0.000799844	-0.03172	0.380333	-0.471744	0.516928	0.673653	-0.766968	0.81945	0.863855	0.673653	-0.927686	0.0703848	0.561873
4CL	DN48382_c0_g1_i3_1	-0.376372	-0.34018	-0.508289	-0.272232	-0.362832	-0.402344	-0.592038	0.930108	-0.0152929	-0.753513	-0.17505	-0.0159696	-0.565776	-0.497763	-0.501044	-0.023246	-0.3509	-0.17505	-0.054802	0.409322	-0.855514	0.734832	0.581589	-0.28216	0.136237	-0.12949	-0.491945	-0.28216	0.316685	-0.50827	-0.768001
4CL	DN52214_c0_g1_i3_1	-0.0620782	-0.542992	-0.164659	-0.417952	-0.0373309	-0.334709	-0.31392	0.77826	0.45882	-0.618185	0.284414	0.483782	-0.298739	-0.338888	-0.538474	-0.186055	0.0341288	0.284414	-0.0537126	0.663863	-0.632796	0.416442	0.595243	-0.121133	-0.059635	0.153483	-0.272608	-0.121133	0.138415	-0.327363	-0.638202
4CL	DN33959_c0_g4_i2_2	-0.469568	0.622592	-0.784681	0.629281	-0.477945	-0.643041	-0.72301	-0.0209951	-0.505092	0.259201	-0.452898	-0.468955	-0.629994	0.219248	-0.558966	0.790296	-0.683632	-0.452898	-0.349759	-0.238681	-0.302208	0.573602	-0.604962	-0.776083	0.689046	-0.868837	-0.777641	-0.776083	0.86936	-0.199099	-0.388485
4CL	DN43097_c1_g4_i1_3	0.693135	-0.511841	0.677646	-0.131765	0.611359	0.0549421	0.492174	-0.297874	0.964324	0.263734	0.912213	0.910994	0.544881	0.337159	-0.0239705	-0.243297	0.711103	0.912213	0.12337	0.62591	0.463547	-0.578397	0.0330679	0.253056	-0.353955	0.531134	0.441898	0.253056	-0.310776	0.206034	0.196461
4CL	DN21394_c0_g1_i1_2	-0.361352	0.556068	-0.652059	0.753252	-0.168773	-0.568757	-0.543894	-0.159164	-0.40277	0.31127	-0.271328	-0.406886	-0.690254	0.389931	-0.527746	0.640251	-0.466774	-0.271328	-0.608034	-0.0961281	-0.283018	0.570152	-0.511092	-0.874313	0.486189	-0.668145	-0.588728	-0.874313	0.806587	-0.226039	-0.456537
4CL	DN22067_c0_g1_i1_3	-0.497998	-0.266587	-0.500055	-0.341653	-0.511951	-0.339941	-0.606916	0.944704	-0.181161	-0.772002	-0.331742	-0.12994	-0.526932	-0.593807	-0.387298	-0.00323286	-0.44297	-0.331742	0.0842666	0.252556	-0.843132	0.681938	0.553117	-0.197908	0.213001	-0.182057	-0.486366	-0.197908	0.270004	-0.372194	-0.6178
CHS	DN36532_c0_g1_i1_3	0.581808	-0.452909	0.849597	-0.300072	0.796929	0.793368	0.930771	-0.427696	0.357204	-0.00497731	0.430853	0.208462	0.503575	0.0216943	0.706682	-0.796394	0.725692	0.430853	-0.108756	0.100758	0.477938	-0.593937	0.426567	0.560863	-0.833511	0.908351	0.975507	0.560863	-0.869316	0.143188	0.492474
CHS	DN37607_c0_g1_i2_1	0.527424	-0.34738	0.884353	-0.407604	0.618313	0.862608	0.93038	-0.410785	0.258708	0.0394885	0.320808	0.173605	0.660935	-0.0445117	0.808376	-0.741053	0.673475	0.320808	0.150245	-0.081665	0.567661	-0.714458	0.349409	0.74471	-0.73312	0.834273	0.965545	0.74471	-0.930863	0.335209	0.674419
CHS	DN45607_c0_g1_i1_2	0.0635041	0.362337	-0.219149	0.773435	0.237554	-0.502302	-0.196091	-0.474044	0.112497	0.591953	0.255897	0.0811952	-0.343224	0.687096	-0.493242	0.537967	-0.0259826	0.255897	-0.58252	0.180543	0.0810628	0.169087	-0.592428	-0.737617	0.282511	-0.369421	-0.285159	-0.737617	0.623666	-0.0304595	-0.263125
CHS	DN47968_c0_g1_i1_1	-0.368196	-0.298474	-0.473236	-0.355805	-0.381073	-0.307758	-0.57193	0.956784	0.0141977	-0.811556	-0.150339	0.00840061	-0.489957	-0.563978	-0.516834	-0.10379	-0.370424	-0.150339	-0.060959	0.391456	-0.845783	0.713047	0.568895	-0.186827	0.0546519	-0.114393	-0.475453	-0.186827	0.230328	-0.467667	-0.688042
CHI	DN57004_c0_g1_i1_1	0.247611	-0.0619512	0.61105	-0.280325	0.368992	0.869452	0.748291	-0.42035	-0.184935	0.0193682	-0.0960794	-0.275796	0.478595	-0.155823	0.922378	-0.602725	0.341917	-0.0960794	0.111237	-0.385476	0.508566	-0.53792	0.231769	0.650403	-0.583368	0.578637	0.79828	0.650403	-0.819719	0.252358	0.701427
CHI	DN41399_c0_g3_i1_2	0.0160867	0.199393	0.398467	-0.275435	-0.134148	0.623164	0.438501	-0.321833	-0.372462	0.202938	-0.324276	-0.318611	0.585406	-0.1234	0.807946	-0.167163	0.1068	-0.324276	0.57925	-0.681381	0.530495	-0.592377	-0.133742	0.69743	-0.0916923	0.127846	0.460154	0.69743	-0.54874	0.485958	0.813786
CHI	DN45629_c1_g1_i1_1	-0.243026	0.356395	-0.130996	0.546027	0.311963	-0.12612	0.0373774	-0.409223	-0.181941	0.487461	0.121754	-0.11777	-0.381704	0.630232	-0.137193	0.239892	0.14245	0.121754	-0.649894	0.000749227	-0.0567895	0.169599	-0.344182	-0.594032	0.219308	-0.175284	0.00543669	-0.594032	0.433963	-0.0305826	-0.132784
CHI	DN46990_c0_g1_i4_1	-0.160697	0.12439	0.112726	-0.157854	-0.0202705	0.666625	0.35213	-0.21248	-0.597586	-0.143026	-0.516869	-0.66511	0.139867	-0.343442	0.807548	-0.398647	-0.115819	-0.516869	0.0643013	-0.502608	0.222722	-0.13621	0.181114	0.383677	-0.266971	0.211175	0.413202	0.383677	-0.516894	-0.0728138	0.46981
CHI	DN46990_c0_g2_i7_1	-0.596259	0.456466	-0.543715	0.330592	-0.397321	0.00628598	-0.269523	0.0379714	-0.871681	-0.144916	-0.831413	-0.923609	-0.380296	-0.26009	0.287943	0.196765	-0.504943	-0.831413	-0.159253	-0.596886	-0.251445	0.426381	-0.0701847	-0.168902	0.177167	-0.365919	-0.22978	-0.168902	0.14537	-0.360181	-0.0215598
F3H	DN31649_c1_g3_i1_2	0.478461	-0.387602	0.735101	-0.283961	0.748563	0.824648	0.882168	-0.406012	0.221776	-0.0863381	0.298398	0.0610726	0.40627	-0.0835182	0.753992	-0.834222	0.599815	0.298398	-0.187443	0.082345	0.436099	-0.481597	0.472947	0.520206	-0.842797	0.877921	0.921949	0.520206	-0.871262	0.0312346	0.45814
F3H	DN45570_c0_g2_i1_3	-0.299471	0.631908	-0.588485	0.79129	-0.25971	-0.518776	-0.456145	-0.341069	-0.493003	0.437458	-0.404833	-0.492052	-0.478295	0.365425	-0.344557	0.71612	-0.475873	-0.404833	-0.392796	-0.362067	-0.0622963	0.350385	-0.678903	-0.696494	0.510331	-0.702766	-0.530629	-0.696494	0.689084	-0.107029	-0.195439
F3'H	DN41001_c0_g2_i1_2	0.656537	-0.74431	0.817682	-0.490542	0.743501	0.488832	0.739207	-0.0731403	0.783713	-0.188131	0.739479	0.689666	0.485896	-0.0450445	0.294846	-0.768687	0.790923	0.739479	0.0145218	0.537871	0.260717	-0.499342	0.58782	0.508551	-0.756699	0.930102	0.768052	0.508551	-0.731282	0.0973382	0.196607
F3'H	DN43758_c0_g2_i1_3	-0.615459	0.407204	-0.86183	0.467587	-0.532259	-0.735383	-0.857357	0.398564	-0.481616	-0.0961604	-0.47805	-0.433409	-0.826914	0.0140892	-0.649453	0.669967	-0.677527	-0.47805	-0.332129	-0.0401801	-0.664212	0.818743	-0.20894	-0.799844	0.630882	-0.759126	-0.840829	-0.799844	0.880112	-0.319042	-0.686763
F3'H	DN46768_c0_g1_i5_1	-0.591439	0.318384	-0.874791	0.390285	-0.506661	-0.704429	-0.877326	0.527385	-0.405171	-0.271612	-0.427202	-0.393392	-0.864263	-0.0784222	-0.749623	0.536176	-0.673743	-0.427202	-0.418363	0.0495026	-0.79195	0.915248	-0.0979432	-0.794146	0.490867	-0.701137	-0.841807	-0.794146	0.826291	-0.408535	-0.777801
DFR	DN49637_c0_g1_i16_1	0.278695	-0.0135676	0.637848	-0.236649	0.448679	0.627484	0.623801	-0.368325	0.0221827	0.29069	0.214211	0.0447208	0.292287	0.28883	0.487214	-0.366262	0.543296	0.214211	0.00265045	-0.23079	0.355429	-0.471588	0.0459919	0.33758	-0.366272	0.38018	0.670996	0.33758	-0.427945	0.597841	0.466277
DFR	DN49637_c0_g2_i1_1	0.143148	0.0389825	0.511823	-0.264301	0.305335	0.687769	0.568919	-0.290205	-0.209052	0.153949	-0.0414758	-0.209259	0.22783	0.0938927	0.591513	-0.379664	0.376296	-0.0414758	0.0127212	-0.403519	0.266084	-0.363629	0.105637	0.37516	-0.350747	0.32448	0.632105	0.37516	-0.465047	0.475056	0.485029
DFR	DN39015_c0_g1_i1_3	-0.485614	0.00917166	-0.787734	0.101825	-0.424915	-0.631672	-0.816981	0.71911	-0.199374	-0.515594	-0.297466	-0.216015	-0.839151	-0.289983	-0.756992	0.313742	-0.61381	-0.297466	-0.400544	0.287288	-0.876905	0.924045	0.193545	-0.684383	0.35856	-0.489848	-0.766505	-0.684383	0.684703	-0.554381	-0.858633
DFR	DN41815_c0_g1_i8_3	0.334821	-0.596701	0.583118	-0.63806	0.517676	0.707114	0.607519	0.214911	0.313123	-0.560836	0.265844	0.164811	0.267924	-0.435697	0.484691	-0.909599	0.468142	0.265844	-0.0772314	0.246775	-0.0191969	-0.192838	0.835115	0.596078	-0.835426	0.871679	0.708108	0.596078	-0.825237	-0.106415	0.147055
DFR	DN42380_c0_g4_i2_2	-0.0578897	-0.449419	-0.147536	-0.575775	-0.0961718	-0.0425535	-0.187705	0.765679	0.291962	-0.648317	0.137341	0.293807	-0.164872	-0.452168	-0.382582	-0.301052	0.000647971	0.137341	-0.0235295	0.375331	-0.594189	0.381408	0.580715	0.0932831	-0.118052	0.149585	-0.160546	0.0932831	-0.0202497	-0.36328	-0.470393
DFR	DN43960_c0_g1_i7_3	0.520151	-0.513441	0.759518	-0.440845	0.761831	0.811767	0.856443	-0.228022	0.364941	-0.22403	0.398596	0.207038	0.406482	-0.164867	0.65119	-0.916419	0.642872	0.398596	-0.167291	0.213589	0.332431	-0.441817	0.618343	0.573641	-0.901733	0.950902	0.90301	0.573641	-0.898735	0.0106869	0.356742
DFR	DN44086_c0_g1_i12_1	0.289502	-0.437574	0.598042	-0.45895	0.584724	0.813456	0.724555	-0.0653066	0.107311	-0.393779	0.140887	-0.0447153	0.25417	-0.334468	0.680443	-0.899013	0.460588	0.140887	-0.188954	0.0639383	0.132156	-0.264028	0.692981	0.541248	-0.846398	0.85497	0.813764	0.541248	-0.860674	-0.0668819	0.310419
DFR	DN45181_c3_g1_i7_3	-0.158933	-0.438721	-0.147198	-0.631171	-0.385873	-0.124452	-0.341734	0.872196	0.219896	-0.721582	-0.0120841	0.252119	-0.0364346	-0.615208	-0.273054	-0.197701	-0.171262	-0.0120841	0.381679	0.333561	-0.524282	0.283502	0.542386	0.24209	-0.00341651	0.0503546	-0.26084	0.24209	-0.0632536	-0.201242	-0.319939
ANS	DN41012_c0_g1_i4_3	0.671926	-0.425079	0.944814	-0.388529	0.712157	0.794072	0.93722	-0.414153	0.483741	0.0641008	0.519559	0.369517	0.717651	0.0187114	0.689499	-0.741209	0.743446	0.519559	0.132256	0.109709	0.611287	-0.74262	0.349698	0.730062	-0.77904	0.888206	0.956351	0.730062	-0.918777	0.313674	0.611646
ANS	DN38701_c1_g5_i3_3	-0.168551	0.341252	-0.386759	0.344545	-0.248411	-0.299936	-0.387596	-0.289213	-0.416097	0.316663	-0.327825	-0.381265	-0.456224	0.201368	-0.254202	0.490748	-0.555601	-0.327825	-0.269306	-0.19658	0.0158915	0.197455	-0.526165	-0.620259	0.52031	-0.580596	-0.399192	-0.620259	0.566052	0.0370049	-0.0807238
ANS	DN46932_c2_g1_i3_1	-0.216963	-0.0637711	-0.31605	-0.374759	-0.734375	-0.35676	-0.530357	0.523218	-0.0285506	-0.235121	-0.240801	0.135684	0.0780987	-0.346555	-0.32109	0.299758	-0.40708	-0.240801	0.698354	-0.0806022	-0.200828	0.0544454	-0.104385	0.139856	0.484173	-0.435423	-0.529878	0.139856	0.232703	0.11219	-0.0777026
UFGT	DN43215_c0_g2_i1_3	0.109245	0.283075	0.0860846	0.275274	-0.212548	-0.452445	-0.218763	-0.10416	0.378692	0.561624	0.36937	0.489189	0.3731	0.504356	-0.368205	0.635593	0.103726	0.36937	0.473492	0.0574128	0.268351	-0.290862	-0.613038	0.0129869	0.463451	-0.379442	-0.278625	0.0129869	0.36908	0.479553	0.134145
UFGT	DN38114_c0_g1_i7_2	-0.247702	0.50647	-0.0494594	0.0412905	-0.608676	-0.0366044	-0.122502	-0.193771	-0.406194	0.413166	-0.42045	-0.212939	0.436667	0.0321999	0.27987	0.49236	-0.2402	-0.42045	0.766932	-0.687514	0.391514	-0.40266	-0.584578	0.357643	0.528102	-0.457767	-0.177893	0.357643	0.0480249	0.530874	0.587867
UFGT	DN38555_c0_g1_i2_3	-0.112617	-0.505176	-0.074962	-0.568312	0.0591385	0.124251	-0.114673	0.815429	0.182384	-0.868537	0.050781	0.0820884	-0.296838	-0.590755	-0.155016	-0.530918	-0.00660362	0.050781	-0.210142	0.428841	-0.668192	0.471013	0.858906	0.116807	-0.40642	0.367612	0.00506572	0.116807	-0.205504	-0.454545	-0.490275
UFGT	DN44965_c0_g2_i2_1	0.256915	-0.475034	0.684821	-0.45456	0.317494	0.634568	0.677998	-0.109083	0.138371	-0.229006	0.0930473	0.0729797	0.533447	-0.336048	0.78348	-0.626348	0.466255	0.0930473	0.34201	-0.0442019	0.305943	-0.538792	0.488057	0.704513	-0.559075	0.728145	0.769623	0.704513	-0.840109	0.169226	0.578432
UFGT	DN48727_c0_g1_i1_1	-0.635538	0.0921921	-0.762828	0.156185	-0.59047	-0.702998	-0.766814	0.465652	-0.30848	-0.23279	-0.388008	-0.151318	-0.64907	-0.154481	-0.51988	0.436029	-0.511219	-0.388008	0.00544921	0.149993	-0.585009	0.623628	-0.0739617	-0.606031	0.57813	-0.611374	-0.767492	-0.606031	0.679811	-0.273561	-0.563678
LAR	DN41617_c1_g1_i2_2	0.087315	0.136724	0.330651	-0.112795	0.403736	0.762396	0.480906	-0.24972	-0.272537	0.0248057	-0.040583	-0.398793	0.0350601	0.0783351	0.538064	-0.496624	0.202838	-0.040583	-0.337757	-0.219454	0.165308	-0.064404	0.194674	0.200426	-0.472448	0.322981	0.566763	0.200426	-0.411241	0.0880344	0.25943
LAR	DN43473_c1_g1_i3_3	0.670171	-0.441103	0.953412	-0.334618	0.685673	0.578001	0.887713	-0.478344	0.587537	0.277684	0.645755	0.586597	0.713543	0.249967	0.496384	-0.535455	0.857319	0.645755	0.205072	0.113353	0.609173	-0.840054	0.152041	0.595236	-0.550766	0.764321	0.875625	0.595236	-0.71149	0.499411	0.593404
LAR	DN48109_c1_g1_i17_1	0.17303	-0.155802	0.54388	-0.226893	0.52438	0.77335	0.700371	-0.252379	-0.128307	-0.0470545	0.048385	-0.211329	0.173039	0.00895362	0.652138	-0.631259	0.488485	0.048385	-0.218662	-0.214069	0.152396	-0.257467	0.37262	0.354718	-0.594777	0.58887	0.788348	0.354718	-0.613758	0.155526	0.360609
LAR	DN51829_c0_g1_i1_1	0.621264	-0.460758	0.905688	-0.322824	0.817004	0.761021	0.968476	-0.499308	0.486866	0.10783	0.55817	0.381767	0.604714	0.0924282	0.68972	-0.764835	0.804214	0.55817	-0.0270859	0.197099	0.591458	-0.699133	0.345269	0.586979	-0.776872	0.9047	0.972885	0.586979	-0.859431	0.218583	0.561134
ANR	DN28591_c0_g1_i2_2	0.0495055	0.368634	0.185808	-0.0231438	-0.453131	-0.00663448	-0.0398366	-0.140805	-0.119805	0.366447	-0.151766	0.0306629	0.5266	0.0533222	0.132647	0.395277	-0.140762	-0.151766	0.759397	-0.459966	0.416576	-0.459378	-0.452885	0.405459	0.363478	-0.278648	-0.0747107	0.405459	-0.049664	0.704153	0.527922
ANR	DN37065_c0_g1_i1_3	-0.527316	0.429931	-0.754366	0.432386	-0.545839	-0.78194	-0.856914	0.51913	-0.231091	-0.0286163	-0.236239	-0.142042	-0.586002	0.169288	-0.774196	0.697349	-0.468984	-0.236239	-0.0933519	0.0318941	-0.628007	0.710683	-0.24863	-0.613104	0.605623	-0.740371	-0.851845	-0.613104	0.858649	-0.151043	-0.706034
ANR	DN39975_c0_g2_i3_1	0.176971	-0.0711066	0.602616	-0.273499	0.556859	0.85122	0.765258	-0.324198	-0.112172	-0.0362523	0.0477475	-0.179793	0.262633	-0.0627667	0.769528	-0.695937	0.482596	0.0477475	-0.200773	-0.211293	0.297902	-0.361266	0.38396	0.482698	-0.678997	0.665087	0.81579	0.482698	-0.741567	0.240471	0.492709
FLS	DN25872_c0_g1_i1_2	0.133934	-0.232241	0.557545	-0.508126	0.125792	0.537216	0.608821	-0.269036	0.0426632	0.167916	0.0424006	0.163929	0.642858	-0.0615679	0.720147	-0.330292	0.498368	0.0424006	0.555598	-0.364865	0.477062	-0.743751	0.0514244	0.721929	-0.156189	0.397827	0.593252	0.721929	-0.594404	0.384876	0.726994
FLS	DN29915_c0_g1_i1_2	-0.0412575	0.150036	0.0432379	0.238021	0.374706	0.441793	0.336098	-0.412829	-0.448041	-0.00024929	-0.278758	-0.598704	-0.257306	-0.00977538	0.457683	-0.316451	-0.022214	-0.278758	-0.621415	-0.249684	0.081049	0.0996478	0.11404	-0.146602	-0.369034	0.224614	0.372874	-0.146602	-0.235652	-0.218275	0.133427
FLS	DN37334_c0_g1_i1_1	-0.0318565	0.0904281	0.191027	-0.299895	-0.209867	0.477399	0.278038	-0.24675	-0.404596	0.163984	-0.399228	-0.367436	0.419624	-0.11411	0.680229	-0.083102	0.0218222	-0.399228	0.532982	-0.695641	0.404457	-0.473804	-0.185022	0.537526	0.0349986	-0.0249369	0.303569	0.537526	-0.357455	0.249705	0.636143
