# Supplementary material for: Characterization of the WRKY Gene Family Related to Anthocyanin Biosynthesis and the Regulation Mechanism under Drought Stress and Methyl Jasmonate Treatment in Lycoris radiata
Source: Int J Mol Sci. 2023 Jan 26;24(3):2423. doi: 10.3390/ijms24032423 (PMC9917153; doi:10.3390/ijms24032423)
Supplement: Supplementary file 1 [file ijms-24-02423-s001.zip › Table S4.xlsx]

## Sheet: Table S4
Table S4 . The full-length amino acids sequence of LrWRKYs
>LrWRKY1
MSSYTVLSTNSSENDQSGDTFKIDDYLSFNEEQKESYPMAPPLHQQNQPLQSIPAGYAEKRDEVGNTKNETMAMDAFKGRGFRVAFRTKSEIEIMDDGYKWRKYGKKKVKSSPNLRNYYKCLSDGCKVKKRVEREQDDPSYVITTYEGVHNHDVPLLGARRHHALNSLSHRHSPSAR
>LrWRKY2
MAAIDQYGNMDDFPFNQPSPLDLSDYFLFDGGSVECPMPVQSQNEMLISPADSSNVCSSRRRQVAEFRSGASEERRSEGGGLRVAFRTKSEVDIMDDGFKWRKYGKKSVKNSPNPRNYYRCSTEGCSVKKRVERDPREPSYVITTYDGVHNHSSPDVVYYATQDVESGRFVVSGCHQFLPSS
>LrWRKY3
MDNYPMYSSSSNMVSNTQLFGNNLYRNVPTQTKSDAKDYYSSSSQGIFTNIQEAEDGENLNIEKTGKKNSRRQRYAFQTRSQVDILDDGYRWRKYGQKAVKNNKFPRSYYRCTHQGCNVKKQVQRLAKDEGIVVTTYEGIHTHPIQKSNDNFEHILNQMQIYSSF
>LrWRKY4
MTKSEIDHLEDGYRWRKYGQKAVKNSPFPRSYYRCTNSKCTVKKRVERSSEDPSIVITTYEGQHCHHTVAFPRGATLAPTHSAMSAIPPPLPPQLFLPQLQLQLMDRNNRTRPRIDPSTLLQSPLVLSDHPQQHHQAMTSDMTQAPMTMGPVE
>LrWRKY5
MCDFFWQRSMDRGGGGGGDLVDIIRSVGGPHSEAATGDSWQFPTDAEESFQNFSTDELAASYADAFDLRDPPLNELVGTTLSDCSPDMSCNGSCGGGDGGGSIQKPKNLFSRVVQVLPAKHSTLAHRMIRPFPMVTDRGIHMSSPQAPGIKRRKNPVKKVVCIPAPTAANSARPSSAEVVPSDLWAWRKYGQKPIKGSPYPRGYYRCSSSKGCLARKQVERSRSDPNMLVITYTFEHNHPWPTQRNSLAGSTRSSNPNKSHKITPPPKISNLKDELINTTTSSSSLTTKVKEELIANDHQIFDKLVLYESNDRCDDFFADLVELESDPYEGVDPFVNMFDW
>LrWRKY6
MTVNFMNHSKMDDQISIKEAAFASLQSMETLILSLNGHHHHRQDCASIAEQTVSKFKNFISTLERTGHARFRRGPIQPPPPVQPSLPPQTLTLDFRKPDPKPAAGGKVSDGLCSISPPISGNSSLLSSITADGSVSNGSGSSLFFSAASAGTASATGTAGDLTVSNGRPPMSSSSSKRKYGDGAAVNRCHCSKKRKDRQRRSIRVPAISSKIADIPNDSHWWRKYGQKPIKGSPHPSPYDSRAYYKCSSVRGCPARKHVERAFDDASILVITYEGDHLH
>LrWRKY7
MKMETNMMVNELTHGYELTRELQAQLDLASVEVCKSLVQEIHSSYEKAISMAKSSVLPNLCIESPSSFMESPRSENSKQPFKAKRKEPASKKRKIQAKWINQVKLGSGPEAEGPLEDGHSWRKYGQKEILGAKHPRGYYRCTYRNSQNCLAMKQIQRSDENPLIFEVTYRGTHTCQRKSTPPITPTPSFPKPDHLNPNQNLLLSFQTNLKVKTENLPSSSSFSFPSTPIDNSIDSGFITNFNSAFISPTTSESNYFSANLSEIASVATSTTNSPMLDMDFMLDTIELGQDFPFDAYSFF
>LrWRKY8
MQEAMSDSSSSKRSGTYRKLVQKNVMTVKIESDVGKNKGEGPPSDLWSWRKYGQKPIKGSPYPRGYYRCSTSKGCSAKKQVERCRTDASILIITYTSDHNHSGPDLPPISSTSNSTPQSLQSEENCPTEENINEAKSSDNAMENVKKQPLTEDLVEVKTENESDKLNIVEFSSSPINTEEDNGFFDELEELPMSSSSTSMVRGNFFDERILLLP
>LrWRKY9
MDFQLAMKTAIQEIKRGEELIIILKSHLNPHTQATDLSNGVLRALEAAHAFLKSKEASSGRKTRQKNERDSKRRKSSNSRTIFTPAPHLDGHEWRKYGQKMIQKSKYPRNYYRCTHRGDQGCLATKLVQQHEEGDESLMFQVIYINQHTCNPINYLTTSPQIIFDSTPKYKSNFFIFESNNSCSSAFNNVNVGKEEQLISLGPQSEDSSGETTASNNTSLINDFSLWDLDLCEFDFADVDIVL
>LrWRKY10
MASSTGSLETSANSFSFSLSELLNGGRGDDEIVINERSDFVNSGVGEPKFKSLHPPSLPISPSSFSLSSYFAIPAGLSPAELLDSPVLLSSYNILPSPTTGTIPPQSYNSKQNSTNHQPSIKEEQRTYPDFSFQTNTRTESFNPPSQSWNYQGSRNSTYELTSQATNIKNEEMGIIRTSSTKIQTSQAPQIIRLQRKSDDGYNWRKYGQKQMKGSENPRSYYKCTYPSCPMTKKVERSFDGQITEIVYKGSHNHPKPQSTTRNSSGSQLVQAQVQSESDHSFGAPIESVATPDNSSVSFGDDESNLGGDECDKDEHDAKRLKKEGENEGISVTGNQTVRKPRVAVQTTSDIDILDDGYRWRKYGQKVVKGNPNPRSYYKCTTVGCPVRKHVERASHDIL…
>LrWRKY11
MKTENTINTSEPEISPFFGGDQISGFFDHCSGSSALGFMEMLNGFPQDSSNFFSLFDLPPPTPLTLPPADSSVSEELVNLPVTPNESSISSSSTEAPIESDLGKEAVTAPDADEDDDSAKDKTDKETKKKKKGQKRKREPRFAFLTKSEVDHLEDGYRWRKYGQKAVKDSPFPRSLITYPATTQ
>LrWRKY12
MKTENSTNTSEEISPFFGGDQMSGFFDQNSSSSSLGFMEMLNGFPQDSSNFFSLFDLPPPTPLVLPSVTEEVVNLPATPNESSISSSSTEVPVESDPGKEAVTAPDADEDDDSAKDKTSKEAKKKKGQKRKREQRFAFLTKSEVDHLEDGYRWRKYGQKAVKDSPFPRSYYRCTTAMCGVKKQVERSSKDPTIVMTTYEGKHTHQTPIVPRGSHLMDRFAAPLVQLIPSGQLQLPFFSSYLPQLMPQPSDFHHVESTERVFLNATTDNLSVRDHGLLHDLITSAVIHKIDD
>LrWRKY13
MEFACLDSSSINLDLNIGFRDNSKSLVMKEEMGFFPPVRKSLAKEEVSALEEKLIRMNEENKTLNEKLAIMQESYNILHNKLLDYSMMINNNNNTSSSEEIVEATSPTKKRKSSGSCNIEIVNGGSTLSDDSCKRIREETRPKISKLCVRTDPSDASLVVKDGYQWRKYGQKVTRDNPCPRAYFRCSFAPVCPVKKRVQRSAEDRTILVATYEGEHTHPSPSPTEPLNNNLNTNSCSSRAVMLDLTQSQPQASARQIVERKSSPEMESPEFQRRLAEQMASSLTKDPSFTAALASAISGRFLRLSPDRSY
>LrWRKY14
MDFDRHLPMTLNSSSSSLRHVDDDKLKKRVVDEMDFFSKEKKACEANINLGLKVASLGMIKKEDFTINTRLNLSTTNTGSDQSMVDDVNVEDKESKSELEAMQAELAQIGEENQRLRGVLSEVTDNYNALQMHLITLMRQRSQHINGNDQIEEKKIDVNKGDNAIVPRQFMDLGAQNVETSHSSTEVGSPNRSLSTIDHHERSNADGGFVREESPDQGWGANKQAKLADNSKGPDAQAQEATMRKARVSVRARSDAPMITDGCQWRKYGQKMAKGNPCPRAYYRCTMANGCPVRKQVQRCADDRTILITTYEGNHNHPLPPSAMAMASTTSAAASMLLSGSMPSADGIMNNNFLTRTMLPCSSSMATISATAPFPTVTLDLTQTPNPLQFQRAQGPQFQ…
>LrWRKY15
MVSLVVSAAAAPFVLPTGISPGGLLGLPAMFSSNLGSFGMSHQQALAQVTAQAVQLHSQMHIQPEFSSSHSTTTTADLTQPTHAAINMSPFQQMLPPTSDANNTSFESENVSHCGQRSQPPALVVDKPVDDGYKWRKYGQKQVKGSEYPRSYYKCTHSNCPVKKKVECSLEGQVTEITYKGQHNHQKPPANRRGKDVGFMANGSNELNGYQDYPDNSETVSQGGNFNRPGETMASMSKRERESGLGTSEQLSGSSNDEEVGDAEGGQYEIDSSEPDQKRRVVDARATESTSSHRTVTEPRIIVQTTSEVDLLDDGYRWRKYGQKVVKGNPHPRSYYKCTYTGCNVRKHVERASTDPKAVITTYEGKHNHDVPAARNSSHNTAAASSNSSQQRIHNPIRN…
>LrWRKY16
MIKAEPSPTTGTFSLHSAINKTVGSSSLRSPRRTNRNSAHDEGNFGDFEFKPHARSSSRSGLSSLGPLASGNPTQQEHASCRQTQSQLQTQKSESSQLVQAENTVCFSHELTLSVTASDPPVETLPLEANKPDEVAPCELQQVKGSDNGLQTLESETSEFSLTTGAEKTSEDGYNWRKYGQKLVKGCEFPRSYYKCTHPNCQMKKQLERSHDGQITEIIYKGRHDHPKPETNRRLAFGTILTGQGEERSDRLSSLPSTEDKFLNAHNMDPIGNTELSPKSASDDDAEVGGSSHNVEEVADDDDPESKRRKMDNATFDATQIGKTNREPRVVVQTISEVDILDDGYRWRKYGQKVVKGNPNPRSYYKCTNGGCSVRKHVERASHDPKAVITTYEGKHNHD…
>LrWRKY17
MESANDWDLHAVVRGYSNIIHAATPDIFHSHPVHISNEETVIEEEDNLLFPDLQTTKNALHEFEELYKPFFLKSRQLPKETEIRQQQQAHHPKRKKNKQKKVVCQVRADDVSSDTWAWRKYGQKPIKGSPYPRGYYRCSSSKGCLARKQVERSQTDPTMLVISYTAEHNHPVPTRRSSLAGSTRSKFPLPPSKENVNQNLPLDNKTLSPLSTLTMTSLSPTTSPTTSMEDELVMAKGDVAEENDDVDDDDDDNSMVIKEDMGYMDSGKFGDVINDEDFVQKFFSNIWQVDGSS
>LrWRKY18
MKTENTINTSEPEISPFFGGDQISGFFDHCSSSSALGFMEMLNGFPQDSSNFFSLFDLPPPTPLTLPPADSSVSEELVNLPVTPNESSISSSSTEAPIESDLGKEAVTAPDADEDDDSAKDKTNKETKKKKKGQKRKREPRFAFLTKSEVDHLEDGYRWRKYGQKAVKDSPFPRSYYRCTTVTCGVKKRVERSSKDPTVVITTYEGQHTHHSPIVPRGSHLMDRFSAPPVQNFRMDQFHLPFFNSYLPQPLDLRHLQASNDRRFCNPTAGVSSVRDHGLLHDLISSSVPKVED
>LrWRKY19
MSHQAVLATVTAQAQIQLQAAYPSQSEALANSLPQPAPTNPVPWQQRSSPVLDSNVSTPMSTQPSFDQKSQSTQIAVKTSSDDGYSWRKYGQKQVKSSDITRSYYRCTNGNCMAKKKVERWPDGREIEIIFRGKHNHGPPQKSKYPKEKGVRAPCNENETLDPPSGEVNESDLSASKAERISGNENSEQQLNCSTDCEGDAAIKTEERKDKEPDPKRRLVESHPPYSAPVLKTIKEPKIVVQSASDPACASDGYRWRKYGQKLVKGNPNPRSYYRCTHNGCPVRKHVEKSSNDSQSILITYEGQHNHDRPILKSGSDQHSHTPASSLRDRSTADGELARDKESMESAETLLSIGTNSSDGMNRPLFSENCAVVPIHNS
>LrWRKY20
METPGFSGQFAMTHQAVLATVTAQAQMQLQAANPSQSEALANSPPQPAPTGSVPLLQRPSPVLDSNLSTPMSTQPPPSGQKSQSSQMAVRTSSDDGYSWRKYGQKQVKSSDRTRSYYRCTNANCIAKKKVERYPDGREIEIIFRGNHNHYPPQKSKYPKEKGVRVPCNESEPLDPPCGEVNESDLLASKTERNSGNENSEQQLYCSSDCEGDAAIKMAEGNDNEPDPKKRLVESHPPYSAPVFKTIKGPKVVVQSASDPACTSDGYRWRKYGQKLVKGNSNPRSYYRCTHNGCPVRKHVEKSSDDSKSILITYEGKHNHDQPFLKSGSDQHSHTPETSLHDRSTPADGILAHDNESMESAETLLSIGTNSSGGINLPLFSENCAAVPVHNS
>LrWRKY21
MENMQSEAIQKLINGRELAMRLSTLIQDSSMDEGLIEEVISSISQALHLLESNGLTMKKKNSVCGKGGSRKRRQASQLSTVISKLTSDEYSWRKYGQKVIHGSKFPRSYFRCTHKYDQGCQATKQVQQYSEDDPSVYIITYLGHHSCRSSTNIIPNLIMPSNSTEPSIISFGSNTSNVTQEIPVPSCSLLSQNQENDEEVLSNLHEQTPGFLPSGGSLDMSFFVDSFDFENDVFAFDQGNIF
>LrWRKY22
MCDFFWQRSMDNNDHQGGDLSDIVRSVNPNNSSSSTSTVLDFPIDPAATSFEELPAEDFVTDDPFALRDPLLHELTGTAFYESRPDKSESNNNGGGDDKSSRNNNTLLIGDQEMKRPCNLFSRVLQISPTKHLALSPRAIKPIPSVDMVKVDHGQIQISSPRPPGIKRRKSQAKRVVCIPAPAAASGRPGGEVVPSDLWAWRKYGQKPIKGSPYPRGYYRCSSSKGCSARKQVERNRTDPNMLVITYTSEHNHPWPTQRNALAGSTRSQPSKNSKASLMKEDQTNSKENNIATSSSSSMSINVKEEVMLGDQMDKATVEAEPAMASDYVFNQSDDFFADLAELESDPMSLIFARSDEEVGKEGNKGLDPFINMFDWGVSSFGD
>LrWRKY23
MCDFFWQRSMDHNDHQGGDLSDIIRSVNPNNSSSTATATATATATAVLDFPIDSTTCFEELPIEDFITSDPFSLRDPLLHELTGTAFYKSRPDKSEGNNDSGGDDGSSNNNNKKIMIGDQEMKRPCNLFSRVLQISPAKHPALSPRAIKPLPSVDMVKVDHGQIQVSSPRPPGIKRRKSQAKKVVCIPAPAPAPASSRSSGEVVPSDLWAWRKYGQKPIKGSPYPRGYYRCSSSKGCSARKQVERSRTDPNMLVITYTSEHNHPWPTQRNALAGSTRSQPSKNSKASLVKEETNAKENNIANSSSSSMPATNVKEEVMHRDQMEKVAVEVDPALDNDYVFDQSGDFFADLAELESDPMSLIFTRSDEEIDKEGNKGLDPFINMFDWEGSSFGD
>LrWRKY24
MSYVKMDDQIAIQEAGTAGIRGMEHLVFQLSQQKSPFDCREITDHTVSKFKKMISILNRTGHARFRRGPTGPVHEAVSLPSPSPAPVQAVTFPPPQSLTLDFTKPKAGGEIVKESSGFSISAPMSSANSSFLSSITGDGSVSNGKNGSGILLPPLPPSSIAVSNGKPPLSSSFKKRCQSHGSESAGRCHCSKKRKSRLKRVIRVPAISSKMADIPSDEFSWRKYGQKPIKGSPYPRCYYKCSSMRGCPARKHVERAPDDPSMLIVTYEGEHRHTHNLIADALILKPA
>LrWRKY25
MKMEEVEEANRAALESCHRVLSHLSESQDQSQYRNLMVETGEAVSKFRKVVTLLGNGGGHARVRRSKNTHSFNHKIFMDNPLVASKSTSLNPTQPIPRTLLTITTPELDSTPKTNHHLQLSHKLFLENPMFEQIAAHSQHTSSSSQQFHYLQQQQNTHQRFQQIQIQQQMKLQAELFKRSSSGINLKFDNSSCTPTISSTRSFLSSLSMDGSVASLEGKPFQLIGGSQSSEPVTLRPAHKRRCTGRGEDGSGKCATSGKCHCSRRRKLRVKRSIKVPAISNKLADIPPDEYSWRKYGQKPIKGSPHPRGYYKCSSMRGCPARKHVERCLEDPSMLIVTYEGEHNHTRLLTQSAAT
>LrWRKY26
MQNTEKIVVARPVPSRPFAGRRSFSQLLAGVINSSPQNSITEATAVIKPKTVRFKNSIKISPVESNSSQSNLSDRASPTTSKTDFEPPSLYKPMAKVVSKRATSLMENMGRHDSRQKALEDEQSRFQDMSNVNYVVQGSSSVASAKEIYKHSDLVPPNMEQDTRARRPTNNGDRPSYDGYNWRKYGQKEVKGSKYPRSYYKCTHPSCPMKKQVEKSFDGQIAEIVYKGEHNHPKPQPPKCLGSGSEEQNSDPKIVGSAQHSTTEDYSEVGILGTSHDPSVEYDVENRTSRIHNDRHKSKRRKIKGQVSREGTATQCIDDTEFMMQTCTESHVTGDGFRWRKYGQKIVKGNSYPRSYYKCTNLNCNARKHVERASDDPRSFITTYEGKHNHEMPDERMNS…
>LrWRKY27
MDFFSKEKKAREAANLDLKVAGLGMVKKEDFAIDTVLNLLTTNTGSDQSTVDDVSSPNVEDKEAKSELEAMQAELVRMSGENQRLRGVISQVTNNYNALQMHLITLMQQRNQQYNGNDQIVEKKVDVNYKEEKAIVPRQFMDLGPQNDETSHSSTEVGSPNRSLSPGNKEMPIIDHHERSNANGGFVREESPDQGWGANKQAKLTNTSKGPDAHAQEATMRKARVSVRARSEAPMITDGCQWRKYGQKMAKGNPCPRAYYRCTMATGCPVRKQVQRCADDRTILTTTYEGNHNHPLPPAAMAMASTTSAAAYMLLSGSTSSTDGLMNNNFLTRTMLPCSSSIATISASAPFPTVTLDLTQTPNPPQFQRPQGQQFQLNFPHQPATLPQVFGQTLYNNNN…
>LrWRKY28
MTVDLMNRSKMDDQISINEAAIASLQSMETLIVSLNNHRPQDCAAIADQTVSKFKNFISALDRTGHARFRRGPVQPPPPVQPPPASLPPQALTLDFTKPDPKPAASGKVFDGVFSISPPISGSSSLLSSITADGSVSNGSGSSLFFSAASAGTASAAGVAVDRTVSNGRPPISSSSKRKCSSAAAAGDRCHCSKKRKDRERRSIRVAAVSAKIADIPNDGYSWRKYGQKPIKGSPHPSPYDSRAYYKCSSVRGCPAKKHVERAFDDSTILVVTYDGDHLH
>LrWRKY29
MLTSPTQRNFFSNFMAEVFDPKSFSNGNEGSFLKSKEDENVINAKEEENVDLSTKISPVNSQKPSLTERRAARAGFNAPTINTDQIRAENFSSLTSEIRSPYLTIPPGLSPTTLLDSPVFLSNSLAQPSPTTGTFSFAQYDTNSFSVLADKSKDQLPEGINSQSSDIKPPPGSNPLSFSSGGNQTASSFDPHNSLPCILASLQNSKEINLSERKLSADDVAPNQSLSIPTKGKECSPPPVNSQEEEKGESSIALGAPAEDGYNWRKYGQKHVKGSEYPRSYYKCTHTNCPVKKKVERNHEGQVTEIIYKGAHNHPKPPPNRRSGVPSSHPFNEYQSNGQNWRNENGLEVTPSNEETQDAGEVSSTVSNEEDEEDRVTHGSVFLGCEGEGEENESKRRKV…
>LrWRKY30
MELGRRGSISHYYVPKVSPLSNVGVQPQDNLQGFSMAASHDPIMAAAYNPNSNTWSNIDEDPRAAVDQNNISDTSKGGSSWWKSTGMEKGKMKVRRKMREPRFCFQTRSDHIDVLDDGYKWRKYGQKIVKNSLHPRSYFRCTHQNCRVKKRVERLSEDCRMVITTYEGRHAHTPPDDSNSSEHDQCFSS
>LrWRKY31
MLDSPGFTGQFAMTHQVALATVTAQAQMQLQAAYPSSSEALTKSFPQRAPIGPAPLQQRPPSVPEGNVSTPESVQPPPSDPKSQSTQILVKTSSNDGYNWRKYGQKQVKSKDRSRSYYKCTNVNCFAKKNVERCLDGRETEIVYRGQHNHDPPQKTRCSKERGAQCGGPFGESEILGLPSGDLTQKTRCPKERVAQSGGPSSENETPLTGELPSGEVDESDPSTSKTEQNSGNETPEQQLYCSSDCEGDAAMKTEEEHDYEPDPKRRLTESTTPCSAPPVLKTVKEPRIIVQSASDAAHVTDGYKWRKYGQKFVKGNPNPRSYYRCTHNGCPVRKHVEKASDDSRYLLITYEGKHNHDQPSLKSSGSDQSASAFPIAATAATSVPENYQLHNSDSLVDK…
