# Supplementary material for: Characterization of the WRKY Gene Family Related to Anthocyanin Biosynthesis and the Regulation Mechanism under Drought Stress and Methyl Jasmonate Treatment in Lycoris radiata
Source: Int J Mol Sci. 2023 Jan 26;24(3):2423. doi: 10.3390/ijms24032423 (PMC9917153; doi:10.3390/ijms24032423)
Supplement: Supplementary file 1 [file ijms-24-02423-s001.zip › Table S5.xls]

## Sheet: Table S5
Table S5 . Summary information for LrWRKT proteins in STRING database.
#queryIndex	Gene Name	At_ID	At_Gene_Name	Identity(%)	bitscore	annotation
#queryIndex	queryItem	stringId	identity	bitscore	preferredName	annotation
1	LrWRKY1	3702.AT5G64810.1	59.6	126.3	WRKY51	Probable WRKY transcription factor 51; Transcription factor. Interacts specifically with the W box (5'-(T)TGAC[CT]-3'), a frequently occurring elicitor- responsive cis-acting element (By similarity). Involved in defense responses. May act as positive regulator of salicylic acid (SA)- mediated signaling and negative regulator of jasmonic acid (JA)- mediated signaling; Belongs to the WRKY group II-…
2	LrWRKY2	3702.AT5G64810.1	68.1	133.3	WRKY51	Probable WRKY transcription factor 51; Transcription factor. Interacts specifically with the W box (5'-(T)TGAC[CT]-3'), a frequently occurring elicitor- responsive cis-acting element (By similarity). Involved in defense responses. May act as positive regulator of salicylic acid (SA)- mediated signaling and negative regulator of jasmonic acid (JA)- mediated signaling; Belongs to the WRKY group II-…
3	LrWRKY3	3702.AT5G13080.1	80.4	180.3	WRKY75	Arabidopsis thaliana wrky dna-binding protein 75; WRKY75 is one of several transcription factors induced during Pi deprivation. It is nuclear localized and regulated differentially during Pi starvation. RNAi mediated suppression of WRKY75 made the plants more susceptible to Pi stress as indicated by the higher accumulation of anthocyanin during Pi starvation
4	LrWRKY4	3702.AT1G69310.1	65.4	167.2	WRKY57	Probable WRKY transcription factor 57; Transcription factor. Interacts specifically with the W box (5'-(T)TGAC[CT]-3'), a frequently occurring elicitor- responsive cis-acting element (By similarity)
5	LrWRKY5	3702.AT2G34830.1	85.3	191.8	WRKY35	Probable WRKY transcription factor 35; Transcription factor. Interacts specifically with the W box (5'-(T)TGAC[CT]-3'), a frequently occurring elicitor- responsive cis-acting element (By similarity)
6	LrWRKY6	3702.AT4G31550.1	44.8	222.2	WRKY11	Probable WRKY transcription factor 11; Transcription factor. Interacts specifically with the W box (5'-(T)TGAC[CT]-3'), a frequently occurring elicitor- responsive cis-acting element (By similarity)
7	LrWRKY7	3702.AT4G11070.1	36.8	152.9	WRKY41	Probable WRKY transcription factor 41; Transcription factor. Interacts specifically with the W box (5'-(T)TGAC[CT]-3'), a frequently occurring elicitor- responsive cis-acting element (By similarity)
8	LrWRKY8	3702.AT2G34830.1	61.6	123.2	WRKY35	Probable WRKY transcription factor 35; Transcription factor. Interacts specifically with the W box (5'-(T)TGAC[CT]-3'), a frequently occurring elicitor- responsive cis-acting element (By similarity)
9	LrWRKY9	3702.AT2G40750.1	37.6	78.2	WRKY54	Probable WRKY transcription factor 54; Transcription factor. Interacts specifically with the W box (5'-(T)TGAC[CT]-3'), a frequently occurring elicitor- responsive cis-acting element (By similarity)
10	LrWRKY10	3702.AT2G38470.1	53.7	320.1	WRKY33	Probable WRKY transcription factor 33; Transcription factor. Interacts specifically with the W box (5'-TTGAC[CT]-3'), a frequently occurring elicitor-responsive cis-acting element. Involved in defense responses. Required for resistance to the necrotrophic fungal pathogen B.cinerea. Regulates the antagonistic relationship between defense pathways mediating responses to the bacterial pathogen P. sy…
11	LrWRKY11	3702.AT1G29860.1	77.3	73.9	WRKY71	Probable WRKY transcription factor 71; Transcription factor. Interacts specifically with the W box (5'-(T)TGAC[CT]-3'), a frequently occurring elicitor- responsive cis-acting element (By similarity)
12	LrWRKY12	3702.AT5G49520.1	79.2	139.4	WRKY48	Arabidopsis thaliana wrky dna-binding protein 48; Encodes WRKY48, a member of the WRKY Transcription Factor. WRKY48 is a stress- and pathogen-induced transcriptional activator that represses plant basal defense
13	LrWRKY13	3702.AT1G80840.1	47.2	147.1	WRKY40	Probable WRKY transcription factor 40; Pathogen-induced transcription factor. Binds W-box sequences in vitro. Forms protein complexes with itself and with WRKY40 and WRKY60. Coexpression with WRKY18 or WRKY60 made plants more susceptible to both P. syringae and B. cinerea. WRKY18, WRKY40, and WRKY60 have partially redundant roles in response to the hemibiotrophic bacterial pathogen Pseudomonas sy…
14	LrWRKY14	3702.AT4G04450.1	45.7	319.3	WRKY42	WRKY family transcription factor; Transcription factor. Interacts specifically with the W box (5'-(T)TGAC[CT]-3'), a frequently occurring elicitor- responsive cis-acting element (By similarity). Modulates phosphate homeostasis and Pi translocation by regulating PHO1 expression
15	LrWRKY15	3702.AT1G13960.1	54.1	345.1	WRKY4	Probable WRKY transcription factor 4; Transcription factor that binds specifically to the W box (5'-(T)TGAC[CT]-3'), a frequently occurring elicitor- responsive cis-acting element. Has a positive role in resistance to necrotrophic pathogens (e.g. Botrytis cinerea), but a negative effect on plant resistance to biotrophic pathogens (e.g. Pseudomonas syringae)
16	LrWRKY16	3702.AT4G26640.2	43.9	284.6	WRKY20	WRKY family transcription factor family protein; Transcription factor. Interacts specifically with the W box (5'-(T)TGAC[CT]-3'), a frequently occurring elicitor- responsive cis-acting element (By similarity)
17	LrWRKY17	3702.AT4G01250.1	39.7	160.2	WRKY22	WRKY family transcription factor; Transcription factor involved in the expression of defense genes in innate immune response of plants. Interacts specifically with the W box (5'-(T)TGAC[CT]-3'), a frequently occurring elicitor-responsive cis-acting element. Activates WRKY 29, SIRK and its own promoters; Belongs to the WRKY group II-e family
18	LrWRKY18	3702.AT5G49520.1	49.2	162.2	WRKY48	Arabidopsis thaliana wrky dna-binding protein 48; Encodes WRKY48, a member of the WRKY Transcription Factor. WRKY48 is a stress- and pathogen-induced transcriptional activator that represses plant basal defense
19	LrWRKY19	3702.AT1G13960.1	42.3	225.3	WRKY4	Probable WRKY transcription factor 4; Transcription factor that binds specifically to the W box (5'-(T)TGAC[CT]-3'), a frequently occurring elicitor- responsive cis-acting element. Has a positive role in resistance to necrotrophic pathogens (e.g. Botrytis cinerea), but a negative effect on plant resistance to biotrophic pathogens (e.g. Pseudomonas syringae)
20	LrWRKY20	3702.AT1G13960.1	46.5	209.5	WRKY4	Probable WRKY transcription factor 4; Transcription factor that binds specifically to the W box (5'-(T)TGAC[CT]-3'), a frequently occurring elicitor- responsive cis-acting element. Has a positive role in resistance to necrotrophic pathogens (e.g. Botrytis cinerea), but a negative effect on plant resistance to biotrophic pathogens (e.g. Pseudomonas syringae)
21	LrWRKY21	3702.AT3G56400.1	52	108.2	WRKY70	Arabidopsis thaliana wrky dna-binding protein 70; Member of WRKY Transcription Factor; Group III. Function as activator of SA-dependent defense genes and a repressor of JA-regulated genes. WRKY70-controlled suppression of JA-signaling is partly executed by NPR1
22	LrWRKY22	3702.AT1G30650.1	39.2	227.6	WRKY14	Probable WRKY transcription factor 14; Transcription factor. Interacts specifically with the W box (5'-(T)TGAC[CT]-3'), a frequently occurring elicitor- responsive cis-acting element (By similarity)
23	LrWRKY23	3702.AT1G30650.1	37.4	204.5	WRKY14	Probable WRKY transcription factor 14; Transcription factor. Interacts specifically with the W box (5'-(T)TGAC[CT]-3'), a frequently occurring elicitor- responsive cis-acting element (By similarity)
24	LrWRKY24	3702.AT4G31550.1	53.9	283.5	WRKY11	Probable WRKY transcription factor 11; Transcription factor. Interacts specifically with the W box (5'-(T)TGAC[CT]-3'), a frequently occurring elicitor- responsive cis-acting element (By similarity)
25	LrWRKY25	3702.AT2G30590.1	53.1	279.3	WRKY21	Probable WRKY transcription factor 21; Transcription factor. Interacts specifically with the W box (5'-(T)TGAC[CT]-3'), a frequently occurring elicitor- responsive cis-acting element (By similarity)
26	LrWRKY26	3702.AT2G37260.1	37.3	229.6	TTG2	Wrky family transcription factor family protein; Encodes a protein similar to WRKY transcription factors that is expressed in the seed integument and endosperm. Mutants are defective in proanthocyanidin synthesis and seed mucilate deposition. Seeds are yellow colored. Seed size is also affected; seeds are reduced in size but only when the mutant allele is transmitted through the female parent.Los…
27	LrWRKY27	3702.AT1G62300.1	46.5	279.3	WRKY6	WRKY family transcription factor; Transcription factor involved in the control of processes related to senescence and pathogen defense. Interacts specifically with the W box (5'- (T)TGAC[CT]-3'), a frequently occurring elicitor-responsive cis- acting element. Activates the transcription of the SIRK gene and represses its own expression and that of the WRKY42 genes. Modulates phosphate homeostasis…
28	LrWRKY28	3702.AT2G24570.1	47.1	213	WRKY17	Probable WRKY transcription factor 17; Transcription factor. Interacts specifically with the W box (5'-(T)TGAC[CT]-3'), a frequently occurring elicitor- responsive cis-acting element (By similarity)
29	LrWRKY29	3702.AT5G56270.1	37.6	327.4	WRKY2	Probable WRKY transcription factor 2; Transcription factor. Regulates WOX8 and WOX9 expression and basal cell division patterns during early embryogenesis. Interacts specifically with the W box (5'-(T)TGAC[CT]-3'), a frequently occurring elicitor-responsive cis-acting element. Required to repolarize the zygote from a transient symmetric state; Belongs to the WRKY group I family
30	LrWRKY30	3702.AT2G44745.1	80	179.1	WRKY12	Probable WRKY transcription factor 12; Transcription factor. Interacts specifically with the W box (5'-(T)TGAC[CT]-3'), a frequently occurring elicitor- responsive cis-acting element (By similarity)
31	LrWRKY31	3702.AT1G13960.1	41.2	229.9	WRKY4	Probable WRKY transcription factor 4; Transcription factor that binds specifically to the W box (5'-(T)TGAC[CT]-3'), a frequently occurring elicitor- responsive cis-acting element. Has a positive role in resistance to necrotrophic pathogens (e.g. Botrytis cinerea), but a negative effect on plant resistance to biotrophic pathogens (e.g. Pseudomonas syringae)
