# Supplementary material for: Characterization of the WRKY Gene Family Related to Anthocyanin Biosynthesis and the Regulation Mechanism under Drought Stress and Methyl Jasmonate Treatment in Lycoris radiata
Source: Int J Mol Sci. 2023 Jan 26;24(3):2423. doi: 10.3390/ijms24032423 (PMC9917153; doi:10.3390/ijms24032423)
Supplement: Supplementary file 1 [file ijms-24-02423-s001.zip › Table S6.xlsx]

## Sheet: Table S6
Table S6. Primers used in this study
Names	Sequences (5'-3')
Primers used for quantitative RT-PCR
LrWRKY1-qrt-F	AGAGAGCAAGATGACCCAAGC
LrWRKY1-qrt-R	CGAGCAGATGGACTATGGCG
LrWRKY2-qrt-F	CCCAATGCCCGTTCAATCAC
LrWRKY2-qrt-R	GCTTCGTCTCTCCTCCGATG
LrWRKY3-qrt-F	CCGACGCAGACAAAGAGTGA
LrWRKY3-qrt-R	CCTCGTCTGGAAGGCGTATC
LrWRKY4-qrt-F	ATCACCACCTACGAAGGCCA
LrWRKY4-qrt-R	GTGGTGGTGGAATTGCTGAC
LrWRKY5-qrt-F	TGACATCATCCGTAGCGTCG
LrWRKY5-qrt-R	ATTCATTCAGCGGTGGGTCC
LrWRKY6-qrt-F	TCCTCTCCCTCAACGGTCAT
LrWRKY6-qrt-R	GCTTCCTGAAGTCGAGGGTC
LrWRKY7-qrt-F	AGCCAAACATCCAAGAGGCT
LrWRKY7-qrt-R	GGAAGGATGGCGTTGGAGTT
LrWRKY8-qrt-F	CGAAGGGCCACCTTCTGATT
LrWRKY8-qrt-R	GCTTCTTTGCGGAACATCCC
LrWRKY9-qrt-F	GGAGTATTACGCGCACTGGA
LrWRKY9-qrt-R	AGATGCGGTGCTGGTGTAAA
LrWRKY10-qrt-F	TGCTGTTCAGACTACGAGCG
LrWRKY10-qrt-R	CCTCTCTACGTGCTTGCGAA
LrWRKY11-qrt-F	ATCTGATGGACCGATTCGCC
LrWRKY11-qrt-R	TTGGAGCAACCCATGATCCC
LrWRKY12-qrt-F	GAATTTACCGGCCACTCCCA
LrWRKY12-qrt-R	ACCTCTGCTCCCTTTTACGC
LrWRKY13-qrt-F	GGGACAATCCATGCCCAAGA
LrWRKY13-qrt-R	CCTCGTAAGTTGCGACCAGA
LrWRKY14-qrt-F	CCACCATGAGGAAAGCTCGT
LrWRKY14-qrt-R	GCCATCGTGCATCGGTAGTA
LrWRKY15-qrt-F	TGGCTACAAATGGCGGAAGT
LrWRKY15-qrt-R	GCCTATTAGCTGGGGGCTTT
LrWRKY16-qrt-F	GGGAATCCGAACCCAAGGAG
LrWRKY16-qrt-R	ATGGTTGTGCTTTCCCTCGT
LrWRKY17-qrt-F	CGGGCAAAAACCCATCAAGG
LrWRKY17-qrt-R	TGTGCTCGGCAGTGTAACTT
LrWRKY18-qrt-F	CATCACTACGTACGAGGGGC
LrWRKY18-qrt-R	AGGTGGAACTGATCCATGCG
LrWRKY19-qrt-F	CTGTTTTGGCCACTGTCACG
LrWRKY19-qrt-R	ATACTGGGGACGACCTTTGC
LrWRKY20-qrt-F	CTGTTCGCAAGCACGTTGAA
LrWRKY20-qrt-R	ATCACTGCCGCTTTTGAGGA
LrWRKY21-qrt-F	CAAAAGCTGATCAACGGGCG
LrWRKY21-qrt-R	TGAACCTCCTTTCCCACACA
LrWRKY22-qrt-F	GCCGGATCAACAAGATCCCA
LrWRKY22-qrt-R	TCTGCTTCAACTGTCGCCTT
LrWRKY23-qrt-F	CCGACATCATCCGCAGTGTA
LrWRKY23-qrt-R	TCGCGTAAGGAAAAGGGGTC
LrWRKY24-qrt-F	GGGTTATCAGAGTACCGGCG
LrWRKY24-qrt-R	CATCGAAGGATCGTCTGGGG
LrWRKY25-qrt-F	GGGTTCTCCACATCCAAGGG
LrWRKY25-qrt-R	ACAATCAGCATCGAGGGGTC
LrWRKY26-qrt-F	TGTACACACCCAAGCTGTCC
LrWRKY26-qrt-R	TTGCTCTTCTGACCCCGAAC
LrWRKY27-qrt-F	CCACCATGAGGAAAGCTCGT
LrWRKY27-qrt-R	GCCATCGTGCATCGGTAGTA
LrWRKY28-qrt-F	GAGTAGCCGTTGACCGTACC
LrWRKY28-qrt-R	GGGGATGTCCGCTATCTTCG
LrWRKY29-qrt-F	CGCAAGCATGTAGAACGAGC
LrWRKY29-qrt-R	AGGTGGATGCGAGGTTGAAG
LrWRKY30-qrt-F	GAACAGCCTACACCCAAGGA
LrWRKY30-qrt-R	GGGGGAGTATGTGCGTGTC
LrWRKY31-qrt-F	GCAGCGCATGTAACTGATGG
LrWRKY31-qrt-R	AAGGCTGGTCATGGTTGTGT
LrTIP41-qrt-F	GCAACCATCCAAAGTTTAACTGCT
LrTIP41-qrt-R	AATGTGCAAGCAGGGCTAGTAA
Primers used for LrWRKYscloning
LrWRKY3-GFP4-F-Kpn I	ATTTACGAACGATAGGGTACCATGGACAACTATCCCATGTAC
LrWRKY3-GFP4-R-BamH I	GCCCTTGCTCACCATGGATCCAAAGCTAGAGTATATCTGCAT
LrWRKY10-GFP4-F-Kpn I	ATTTACGAACGATAGGGTACCATGGCTTCTTCAACAGGGAG
LrWRKY10-GFP4-R-BamH I	GCCCTTGCTCACCATGGATCCACATAACAGCGACTCGATAAAC
LrWRKY13-GFP4-F-Kpn I	ATTTACGAACGATAGGGTACCATGGAGTTTGCGTGTTTGGATTC
LrWRKY13-GFP4-R-BamH I	GCCCTTGCTCACCATGGATCCATAACTACGATCTGGAGAAAG
LrWRKY21-GFP4-F-Kpn I	ATTTACGAACGATAGGGTACCATGGAAAATATGCAGAGTGAGG
LrWRKY21-GFP4-R-BamH I	GCCCTTGCTCACCATGGATCCATCCCCAAAGACTCAGAAAATG
LrWRKY27-GFP4-F-Kpn I	ATTTACGAACGATAGGGTACCATGGACTTCTTCTCCAAGGAG
LrWRKY27-GFP4-R-BamH I	GCCCTTGCTCACCATGGATCCAGCTGTAAAATTCGGATCGGAAG
Primers used for LrbHLHscloning
LrbHLH4-GFP4-F-Kpn I	ATTTACGAACGATAGGGTACCATGGACTTCTTTTCATCATCATCATC
LrbHLH4-GFP4-R-BamH I	GCCCTTGCTCACCATGGATCCAACTGCTCTCTCCACTTCATTTGTC
LrbHLH7-GFP4-F-Kpn I	ATTTACGAACGATAGGGTACCCAATGTCAGTTCAAAAAGAAATATGTGGC
LrbHLH7-GFP4-R-BamH I	GCCCTTGCTCACCATGGATCCCAGCTCCGCCTTCATAGAACCATTTAGC
LrbHLH14-GFP4-F-Kpn I	ATTTACGAACGATAGGGTACCATGGCAGAGTTTGTAAATTGTCCC
LrbHLH14-GFP4-R-BamH I	GCCCTTGCTCACCATGGATCCAAAGGGCATTGTTGATTGGAAGC
LrbHLH18-GFP4-F-Kpn I	ATTTACGAACGATAGGGTACCATGATGGAGTCTTCAAATCTAAATC
LrbHLH18-GFP4-R-BamH I	GCCCTTGCTCACCATGGATCCTCCCCGATAATTATTTGGCGACC
LrbHLH19-GFP4-F-Kpn I	ATTTACGAACGATAGGGTACCATGGAGTTTCAAGGTAAAAAAACAAC
LrbHLH19-GFP4-R-BamH I	GCCCTTGCTCACCATGGATCCGCTGTTATCTGATCTACGCCTCTTTGGGG
LrbHLH22-GFP4-F-Kpn I	ATTTACGAACGATAGGGTACCCAAGTAATGGAGGTGAATCTTGATTCTGG
LrbHLH22-GFP4-R-BamH I	GCCCTTGCTCACCATGGATCCACCTTGGAAGTTCTGGGAGGAGACAG
LrbHLH25 -GFP4-F-Kpn I	ATTTACGAACGATAGGGTACCATGCAAAGCCAGAACAATCGAAAACC
LrbHLH25-R-BamH I	GCCCTTGCTCACCATGGATCCACCAAATTGGCCATTTTGAATAT
LrbHLH28-GFP4-F-Kpn I	ATTTACGAACGATAGGGTACCATGGAAGAAGAACAGAAAATTAAAC
LrbHLH28-GFP4-R-BamH I	GCCCTTGCTCACCATGGATCCATATAACATACCATGAGACCCTGCAGAG
LrbHLH36-GFP4-F-Kpn I	ATTTACGAACGATAGGGTACCATGGAATCGGCGTCGAGATGCAAC
LrbHLH36-GFP4-R-BamH I	GCCCTTGCTCACCATGGATCCGCTATTGTTACTTGGCTTATGTCTC
LrbHLH37-GFP4-F-Kpn I	ATTTACGAACGATAGGGTACCTCAATGCCGGTTCACAAAGAATTTTCTTC
LrbHLH37-GFP4-R-BamH I	GCCCTTGCTCACCATGGATCCGTCCACCTTCATAGATCCAGTTAGATCC
LrbHLH43 -GFP4-F-Kpn I	ATTTACGAACGATAGGGTACCATGAATCTTTGGACTGATGACAACGCC
LrbHLH43--GFP4-R-BamH I	GCCCTTGCTCACCATGGATCCCTCCGCGATACGAGAATAGAGAGCAGC
bHLH47-GFP4-F-Kpn I	ATTTACGAACGATAGGGTACCATGAAGAGGATGCGAGGACCCATTAAC
bHLH47-GFP4-R-BamH I	GCCCTTGCTCACCATGGATCCGCAGCACCGATCACAAGTAGCGCTGAT
bHLH48-GFP4-F-Kpn I	ATTTACGAACGATAGGGTACCATGGATGATGTGGAAGCAGAGTATAAC
bHLH48-GFP4-R-BamH I	GCCCTTGCTCACCATGGATCCTTCAGAGCTCGTTGCATCATACTCTGC
bHLH14-BK-F-Nde I	TCAGAGGAGGACCTGCATATGGATGATGTGGAAGCAGAGTATAAC
bHLH14-BK-R-EcoR I	TCGACGGATCCCCGGGAATTCTTCAGAGCTCGTTGCATCATACTCTGC
bHLH14-AD-F-Nde I	GCCATGGAGGCCAGTGAATTCATGGATGATGTGGAAGCAGAGTATAAC
bHLH14-AD-R-EcoR I	CAGCTCGAGCTCGATGGATCCTTCAGAGCTCGTTGCATCATACTCTGC
LrbHLH26-BK-F-Nde I	TCAGAGGAGGACCTGCATATGGAAGAAGAACAGAAAATTAAAC
LrbHLH26-BK-R-EcoR I	TCGACGGATCCCCGGGAATTCATATAACATACCATGAGACCCTGCAGAG
LrbHLH26-AD-F-Nde I	GCCATGGAGGCCAGTGAATTCATGGAAGAAGAACAGAAAATTAAAC
LrbHLH26-AD-R-EcoR I	CAGCTCGAGCTCGATGGATCCATATAACATACCATGAGACCCTGCAGAG
LrbHLH32-BK-F-Nde I	TCAGAGGAGGACCTGCATATGAAATTAGAAATGACCAACGGG
LrbHLH32-BK-R-EcoR I	TCGACGGATCCCCGGGAATTCCTTGCGAGATATAGCATCAATTAGG
LrbHLH32-AD-F-Nde I	GCCATGGAGGCCAGTGAATTCATGAAATTAGAAATGACCAACGGG
LrbHLH32-AD-R-EcoR I	CAGCTCGAGCTCGATGGATCCCTTGCGAGATATAGCATCAATTAGG
